1  
2  
3  
4  
5  
6  
7  
8  
9  
10  
11  
12  
13  
14  
15  
16  
17  
18  
19  
20  
21  
22  
23  
24  
25  
26  
27  
28  
29  
30

## The Neural System of Metacognition Accompanying Decision-Making in The Prefrontal Cortex

Lirong Qiu<sup>1,2</sup>, Jie Su<sup>1,2</sup>, Yinmei Ni<sup>1,2</sup>, Yang Bai<sup>1</sup>, Xiaoli Li<sup>1</sup>, Xiaohong Wan<sup>1,\*</sup>

<sup>1</sup>State Key Laboratory of Cognitive Neuroscience and Learning and IDG/McGovern Institute for Brain Research, Beijing Normal University, Beijing, 100875, China.

<sup>2</sup>Co-first author.

\*Correspondence to X.W. Email: [xhwan@bnu.edu.cn](mailto:xhwan@bnu.edu.cn).

### Abstract

Decision-making is usually accompanied by metacognition, through which a decision maker monitors the decision uncertainty and consequently revises the decision, even prior to feedback. However, the neural mechanisms of metacognition remain controversial: one theory proposes that metacognition coincides the decision-making process; and another addresses that it entails an independent neural system in the prefrontal cortex (PFC). Here we devised a novel paradigm of “decision-redecision” to investigate the metacognition process in redecision, in comparison with the decision process. We here found that the anterior PFC, including dorsal anterior cingulate cortex (dACC) and lateral frontopolar cortex (IFPC), were exclusively activated after the initial decisions. dACC was involved in decision uncertainty monitoring, whereas IFPC was involved in decision adjustment controlling, subject to control demands of the tasks. Our findings support that the PFC is essentially involved in metacognition and further suggest that functions of the PFC in metacognition are dissociable.

### Keywords

Metacognition; Decision-making; Uncertainty; Cognitive control; Dorsal anterior cingulate cortex; Frontopolar cortex; Prefrontal cortex; fMRI.

## 31 Introduction

32

33 Decision-making is a process of evidence accumulation. The evidence comes from sensory  
34 signals of external stimuli or mental representations of internal cognitive operation. Variations of  
35 evidence may render a decision uncertain. A decision maker is often intentionally or  
36 automatically aware of such an uncertain state of the decision, and confirms or revises the initial  
37 decision, even prior to feedback. For instance, before submitting the manuscript, the authors  
38 have revised it several times, as being aware of uncertainty, although the review outcome is  
39 unknown. In literature, the processes of decision uncertainty monitoring and consequent decision  
40 adjustment are termed as metacognition, that is, “cognition about cognition” (Flavell, 1979;  
41 Nelson and Narens, 1990; Dunlosky and Metcalfe, 2009; Fleming and Dolan 2012). Although  
42 metacognition usually accompanies decision-making, the underlying neural processes of decision  
43 uncertainty monitoring and consequent decision adjustment remain less clear than that of the  
44 decision process per se (Gold and Shadlen, 2008; Rushworth et al., 2011), and might be  
45 misattributed to the decision-making process.

46

47 Much of the work on neural basis of metacognition has focused on metacognitive  
48 monitoring of internal states (i.e., confidence, or uncertainty) of such cognitive processes as  
49 episodic memory (Kikyo et al., 2002; Chua et al., 2006) and sensory perception in human  
50 (Fleming et al., 2010, 2012b; Resulaj et al., 2009; Kiani et al., 2014; van den Berg et al., 2016;  
51 Murphy et al., 2016), as well as sensory perception in animals (Kepecs et al., 2008; Kiani and  
52 Shadlen, 2009; Middlebrooks and Sommer, 2012; Komura et al., 2013). Behaviorally, the  
53 confidence ratings that reflect subjective accuracy beliefs on decisions were often found to  
54 deviate from the actual decision accuracy (Kunimoto et al., 2001; Lau and Passingham, 2006;  
55 Wilimzig et al., 2008; Song et al., 2011). These observations indicate that there should exist a  
56 separate neural system (meta-level) to monitor the decision process (object-level) (Flavell, 1979;  
57 Nelson and Narens, 1990; Dunlosky and Metcalfe, 2009; Fleming and Dolan, 2012). The  
58 prefrontal cortex (PFC) has been suggested to play critical roles in the metacognitive monitoring  
59 of decisions (Kikyo et al., 2002; Chua et al., 2006; Shimamura, 2008; Del Cul et al., 2009;  
60 Rounis et al., 2010; Fleming et al., 2010, 2012; Ham et al., 2014; Wan et al., 2016). Essentially,  
61 interference or lesions of the PFC merely impaired the ability of metacognitive monitoring of  
62 decisions, but not the decisions per se (Del Cul et al., 2009; Rounis et al., 2010; Ham et al., 2014;  
63 Fleming et al., 2014).

64

65 On the contrary, it has been addressed that metacognition could be merely dependent on the  
66 decision-making process, and exclusively relies on accumulated evidence (Vickers 1979; Kiani  
67 and Shadlen, 2009; Resulaj et al., 2009; Pleskac and Busemeyer, 2010; Kiani et al., 2014; Yu et  
68 al., 2015; van den Berg et al., 2016). Specifically, this theory on the basis of bounded  
69 accumulation models interpreted that the divergence between decision accuracy and confidence  
70 reports might be caused by continuous post-decisional evidence accumulation during the  
71 intervals between decisions and confidence reports (Resulaj et al., 2009; Pleskac and Busemeyer,  
72 2010; Yu et al., 2015; van den Berg et al., 2016). Further, decision adjustment could naturally  
73 occur by continuous post-decisional evidence accumulation (Resulaj et al., 2009; van den Berg et  
74 al., 2016). Therefore, it argues that a separate neural system for metacognition to monitor and  
75 control the decision-making process should be not necessary (van den Berg et al., 2016).

76

77 The purpose of the retrospective metacognition accompanying uncertain decisions is to  
78 confirm or revise the foregone decisions, prior to feedback. Given an opportunity to make a  
79 decision on the same situation again (*redecision*), the decision maker might revise the initial  
80 decision and update the confidence rating, on the basis of the foregone decisions (van den Berg  
81 et al., 2016; Wan et al., 2016). It could be difficult to discriminate the above two theories in a  
82 single decision paradigm, as the decision-making process and the metacognition process are  
83 inevitably coupled together. To examine the behavioral performance and neural activities in  
84 redecision, however, may allow us to directly test whether the metacognition process would  
85 coincide the decision-making process or entail another separate neural system (Yeung and  
86 Summerfield, 2014; Fleming, 2016). If it were the former, then the redecision process would  
87 evoke exactly the same neural system of the decision-making process as that in the initial  
88 decision. Critically, the divergence between decision accuracy and confidence reports within and  
89 across individual participants would be much reduced, or the individual metacognitive abilities  
90 would be much improved by redecision, as more evidence would be further accumulated.  
91 Otherwise, a separate neural system for metacognition, other than that occurred in the initial  
92 decision, would be newly recruited in redecision. Importantly, the individual metacognitive  
93 abilities might be intrinsically dependent on the circuit of this separate neural system, other than  
94 that of the decision-making system or the accumulated evidence. In other words, the individual  
95 metacognitive abilities would be not much changed by redecision. Further, in addition to  
96 metacognitive monitoring that immediately occurs after decisions even with no requirement for  
97 redecision (Wan et al., 2016), the process of redecision should be necessarily comprised of  
98 metacognitive controlling, to revise the foregone decisions, which should be different from the  
99 decision-making process in the initial decision. Metacognitive monitoring and metacognitive  
100 controlling are the two key components of metacognition (Flavell, 1979; Nelson and Narens,  
101 1990; Dunlosky and Metcalfe, 2009). So far, the neural process of metacognitive controlling has  
102 been little explored (Wan et al., 2016).

103  
104 In the present study, we employed a novel experimental paradigm – “decision-redecision”  
105 (Figure 1A). The participants made two consecutive decisions on the same situation in a  
106 perceptual decision-making task and a rule-based decision-making task. We employed this new  
107 paradigm in functional magnetic resonance imaging (fMRI), to systematically investigate the  
108 neural processes of metacognition during the redecision phase, in comparison with the decision-  
109 making process. We found that the metacognitive processes during the redecision phase in the  
110 two tasks commonly evoked a frontoparietal control network, including dorsal anterior cingulate  
111 cortex (dACC) and lateral frontopolar cortex (IFPC) in the anterior PFC, separate from the  
112 decision-making neural system. Critically, dACC was involved in metacognitive monitoring of  
113 decision uncertainty, encoding the subjective uncertainty states about the forgone decisions; In  
114 contrast, IFPC was involved in metacognitive controlling of decision adjustment, encoding the  
115 strategic signals for exploration of alternative options. The involvement of IFPC in  
116 metacognitive controlling was further dissociated upon the task control demand and intrinsic  
117 motivation in redecision. Thus, our findings support that the PFC is essentially involved in  
118 metacognition, which is largely independent of the decision-making neural system, and further  
119 suggest that the functions of the PFC in metacognition are dissociable.

120

## 121 Results

122

### 123 Task paradigm

124

125 We developed a novel experimental paradigm – “decision-redecision” (Figure 1A). The  
126 participant was instructed to make an initial decision (*decision* phase), immediately followed by  
127 another decision on the same situation (*rededecision* phase), so that the participant could utilize this  
128 opportunity to revise the initial decision and update the confidence rating. The internal states of  
129 uncertainty on the initial and final decisions were separately evaluated by confidence rating  
130 (four-level scales; *confidence* phase), immediately after the decisions. The uncertainty level was  
131 then negative to the confidence rating (*i.e.*, 4 – the confidence level). Different from the previous  
132 paradigm in analysis of ‘change of mind’ (Resulaj et al., 2009; van den Berg et al., 2016), which  
133 was only able to analyze a small portion of trials in which the participant happened to change the  
134 mind, our paradigm here could allow us to analyze each trial regardless of ‘change of mind.’

135

136 We used two different types of decision-making tasks in the present study; one was a rule-  
137 based decision-making (Sudoku) task, and the other was a perceptual decision-making (random  
138 dot motion, RDM) task, which had been intensively used to investigate the neural process of  
139 decision-making (Gold and Shadlen, 2008), and metacognition recently (Kiani and Shadlen,  
140 2009; Resulaj et al., 2009; Kiani et al., 2014; van den Berg et al., 2016). The decision-making  
141 and metacognition processes of the former task might rely on internal information operation, but  
142 those of the latter might be merely dependent on accumulation of external new information. We  
143 compared the behavioral and the neural differences between the decision-making and  
144 metacognition processes, as well as their differences between the two tasks. The sequences of  
145 both tasks were identical (Figure 1A, illustrated for the main fMRI experiment, fMRI1). After a  
146 Sudoku problem or RDM stimulus was presented for 2 s, the participant made a choice from four  
147 options and then reported the confidence rating each in 2 s. Critically, the same Sudoku problem  
148 or RDM stimulus was immediately repeated for 4 s, and the participant made a choice and  
149 reported the confidence rating again each in 2 s. As the control condition, a digital number was  
150 illustrated in the target grid in the Sudoku task, and a RDM stimulus with 100% coherence was  
151 used in the RDM task. For the former, the participant only needed to press the button matching  
152 the number, and for the latter, the participant indicated the unambiguous RDM direction. For  
153 both tasks, the task difficulty (Figure 1B) of each trial was adaptively adjusted by a staircase  
154 procedure (Levitt, 1971; Fleming et al., 2010), so that the average accuracy for the first decision  
155 was converged to approximately 50% (the chance level was 25%). Prior to the experiments, each  
156 participant was trained to attain a high-level proficiency in the Sudoku problem solving.

157

### 158 Behavioral results

159

160 Twenty-one participants took part in fMRI1 (See Materials and Methods). In both tasks, the  
161 uncertainty levels were largely consistent with the error likelihoods of the initial decisions  
162 (Figure 1C;  $r = 0.76 \pm 0.12$ , mean  $\pm$  standard deviation, one tailed  $t$  test,  $t_{21} = 7.3$ ,  $P = 1.7 \times 10^{-7}$   
163 in the Sudoku task;  $r = 0.71 \pm 0.14$ ,  $t_{21} = 6.8$ ,  $P = 5.0 \times 10^{-7}$  in the RDM task). To examine the  
164 trial-by-trial consistency between likelihoods of erroneous decisions and the subjective belief of  
165 uncertainty in each individual participant, a nonparametric approach was employed to construct  
166 the receiver operating characteristic (ROC) curve by characterizing the error likelihoods under

167 the different uncertainty levels of the initial decisions. The area under curve ( $A_{ROC}$ ) was  
168 calculated to represent the individual uncertainty sensitivity, indicating how precisely the  
169 participant was sensitive to the decision uncertainty (Fleming et al., 2010). As similar as the  
170 previous observations (Fleming et al., 2010; Song et al., 2011), the uncertainty sensitivities of  
171 individual participants were markedly deviated from the actual decision accuracy in both tasks  
172 (Figure 1D; one tailed paired- $t$  test,  $t_{21} = 6.6$ ,  $P = 7.3 \times 10^{-7}$  in the Sudoku task;  $t_{21} = 7.8$ ,  $P = 5.6$   
173  $\times 10^{-8}$  in the RDM task). The response time (RT) of option choices in the initial decision was  
174 strongly and positively correlated with the uncertainty level (Figure 1E; one tailed  $t$  test,  $t_{21} =$   
175  $6.9$ ,  $P = 4.0 \times 10^{-7}$  in the Sudoku task;  $t_{21} = 4.3$ ,  $P = 1.6 \times 10^{-4}$  in the RDM task), but was weakly  
176 correlated with the task difficulty (one tailed  $t$  test,  $t_{21} = 2.1$ ,  $P = 0.048$  in the Sudoku task;  $t_{21} =$   
177  $2.0$ ,  $P = 0.052$  in the RDM task), due to the control of task difficulties by the staircase procedure.  
178 Thus, the RT of decision here much reflected the decision uncertainty level, rather than the task  
179 difficulty, indicating that the participants should be aware of uncertainty during the choice, and  
180 might be vacillating among the options during choices. In contrast, the RT for confidence report  
181 was not correlated with the uncertainty level in both tasks (one tailed  $t$  test,  $t_{21} = 1.1$ ,  $P = 0.14$  in  
182 the Sudoku task;  $t_{21} = 1.2$ ,  $P = 0.12$  in the RDM task). Further, the correlation coefficient  
183 between RT of option choices and the uncertainty level ( $r_{RT-uncertainty}$ ) in the initial decision was  
184 highly correlated with the uncertainty sensitivity ( $A_{ROC}$ ) across the participants (Figure 5B;  $r =$   
185  $0.61$ ,  $z$  test,  $z = 3.4$ ,  $P = 4.0 \times 10^{-4}$  in the Sudoku task;  $r = 0.48$ ,  $z = 2.4$ ,  $P = 0.0085$  in the RDM  
186 task). Thus, the RT-uncertainty correlation also reflected individual uncertainty sensitivity.

187  
188 The subjective beliefs of decision uncertainty were much reduced by redecision. The more  
189 uncertain the first decision was, the more reduced the uncertainty level was (Figure 1F). The  
190 extent of uncertainty reduction by redecision was highly correlated with the uncertainty level of  
191 the initial decision (one tailed  $t$  test, Goodman and Kruskal's  $\gamma = 0.82 \pm 0.11$ ,  $t_{21} = 8.8$ ,  $P = 2.1 \times$   
192  $10^{-8}$  in the Sudoku task;  $\gamma = 0.78 \pm 0.14$ ,  $t_{21} = 7.7$ ,  $P = 8.2 \times 10^{-8}$  in the RDM task). Accordingly,  
193 the objective accuracy of decisions was also improved with uncertainty reduction (Figure 1G;  $r =$   
194  $0.54 \pm 0.13$ ,  $t_{21} = 4.2$ ,  $P = 2.3 \times 10^{-4}$  in the Sudoku task;  $r = 0.39 \pm 0.14$ ,  $t_{21} = 2.8$ ,  $P = 5.6 \times 10^{-3}$   
195 in the RDM task). One may suspect that the improvement of uncertainty reduction and accuracy  
196 change would be caused by regression toward mean: the worse at the first measurement, the  
197 greater of the improvement at the second measurement. However, their decision accuracy and  
198 uncertainty levels in the final decision remained significantly differential across the different  
199 uncertainty levels of the initial decision (Figure 1C,  $r = 0.35 \pm 0.15$ ,  $t_{21} = 2.1$ ,  $P = 0.032$  in the  
200 Sudoku task;  $r = 0.36 \pm 0.14$ ,  $t_{21} = 2.6$ ,  $P = 8.9 \times 10^{-3}$  in the RDM task; Figure 1G,  $r = 0.32 \pm$   
201  $0.14$ ,  $t_{21} = 2.0$ ,  $P = 0.042$  in the Sudoku task;  $r = 0.32 \pm 0.15$ ,  $t_{21} = 2.2$ ,  $P = 0.028$  in the RDM  
202 task), indicating that the participants' performance in redecision reflected their (metacognition)  
203 abilities, rather than by chances. Although both uncertainty levels and decision accuracy were  
204 much improved by redecision, the divergence between the uncertainty sensitivity and the  
205 decision accuracy remained significant in the final decision (Figure 1H; one tailed paired- $t$  test,  
206  $t_{21} = 3.4$ ,  $P = 0.0013$  in the Sudoku task;  $t_{21} = 2.6$ ,  $P = 0.0084$  in the RDM task). Indeed, neither  
207 the individual uncertainty sensitivities, nor those of individual differences, were altered by  
208 redecision (Figure 1I; two tailed paired- $t$  test,  $t_{21} = 0.82$ ,  $P = 0.21$  in the Sudoku task;  $t_{21} = 1.0$ ,  $P$   
209  $= 0.15$  in the RDM task). Similarly, neither the individual RT-uncertainty correlation  
210 coefficients, nor those of individual differences, were altered by redecision (Figure 1E; two  
211 tailed paired- $t$  test,  $t_{21} = -0.77$ ,  $P = 0.22$  in the Sudoku task;  $t_{21} = 0.35$ ,  $P = 0.36$  in the RDM

212 task). Altogether, the individual uncertainty sensitivity appeared stable and intrinsic to individual  
213 metacognition ability, independent of the decision-making process or accumulated evidence.

214

215

## 216 **The metacognition network involved in metacognitive monitoring and controlling in** 217 **redecision**

218

219 Commonly across the two tasks, the brain activations in the initial decision were mainly  
220 restricted to the brain areas posterior to the PFC, and the posterior part of the PFC, in particular,  
221 inferior frontal junction (IFJ) (Figure 2A, Figure S1A and S1C), while a frontoparietal control  
222 network, consisting of dACC, IFPC, anterior insular cortex (AIC), middle dorsolateral PFC  
223 (mDLPFC) and anterior inferior parietal lobule (aIPL), was newly or more extensively recruited  
224 in redecision (Figure 2B; Figure S1B and S2; Table S1). However, when a new Sudoku problem  
225 or a new RDM stimulus was presented during the redecision phase, preceded by the control  
226 conditions in the decision phase, the regions of the anterior PFC (*i.e.*, IFPC, mDLPFC, and  
227 dACC) were not activated (fMRI2,  $n = 17$ ; Figure S1A and Figure S3). This result supports that  
228 the frontoparietal control network, in particular, the regions of IFPC, mDLPFC and dACC in the  
229 anterior PFC, were predominately involved in the redecision process, but not involved in the  
230 initial decision process. Thus, the redecision process evoked a separate neural system, separate  
231 from the decision-making neural system.

232

233 Activities in the regions of the frontoparietal control network in redecision were positively  
234 correlated with the uncertainty level of the initial decision (Figure 2C and Table S2). Critically,  
235 these correlations remained significant even for the correct trials only (Figure S1E), indicating  
236 these regions involved in uncertainty monitoring, rather than error monitoring. In contrast,  
237 activities in the ventromedial PFC (VMPFC) and posterior cingulate cortex (PCC) regions of the  
238 default-mode network were negatively correlated with the uncertainty level (Figure S1F).  
239 Although activations in the dACC and AIC regions during the decision phase were also detected  
240 by the general linear modeling (GLM) analyses (Figure 2A and Figure S1A), but activities in the  
241 two regions were not correlated with the uncertainty level (Figure S1D). Furthermore, the  
242 activations of the frontoparietal control network in redecision were not merely involved in  
243 uncertainty monitoring. In the third fMRI experiment (fMRI3,  $n = 25$ ), we confirmed that the  
244 strength of activities in these regions depended critically on whether redecision on the previous  
245 situation was required after the initial decision or not. When the uncertainty levels of the initial  
246 decisions were matched in the two conditions (two tailed paired  $t$  test,  $t_{25} = 0.62$ ,  $P = 0.27$ ),  
247 activities were much stronger in the condition where redecision on the previous situation was  
248 required, in comparison with those in the condition where redecision was not required (Figure  
249 2D), though the activities in the latter condition were also significant, and correlated with the  
250 decision uncertainty level (Figure S1G, Wan et al., 2016). Thus, the regions in the frontoparietal  
251 control network, which were more strongly activated in redecision, should be also involved in  
252 metacognitive controlling. We then putatively defined this frontoparietal control network as the  
253 *metacognition network*.

254

255 As the extent of uncertainty reduction through redecision was highly correlated with the  
256 uncertainty level of the initial decision (Figure 2F), activities in the regions of the metacognition  
257 network were also positively correlated with the extent of uncertainty reduction (Figure S1H).

258 However, these correlations in the regions of the metacognition network became much reduced  
259 after regressed out the factor associated with the uncertainty level (Figure S1I). Conversely, the  
260 correlations with the uncertainty level remained significant after regressed out the factor  
261 associated with the extent of uncertainty reduction (Figure S1J). These partial correlation results,  
262 thus, complementarily confirmed that the cognitive processes of the regions in the metacognition  
263 network during redecision were not only comprised of metacognitive controlling, but also  
264 metacognitive monitoring. The two processes interacted with each other in redecision.

265  
266

### 267 **Dissociation of metacognitive monitoring and controlling in the metacognition network in** 268 **redcision**

269

270 However, these two interactive processes could be dissociated in redecision. In the region that  
271 was essentially involved in uncertainty monitoring, the activity strength should dynamically  
272 reflect the extent of uncertain states. As the uncertainty was reduced by redecision, the activity  
273 strength should become weaker, and this activity change should be negatively correlated with the  
274 extent of uncertainty reduction. Alternatively, in the region that was critically involved in  
275 metacognitive controlling, the activity should become positively correlated with the extent of  
276 uncertainty reduction, representing the effort involved in metacognitive controlling. We found  
277 that the late activities in the dACC and AIC regions became negatively correlated with the extent  
278 of uncertainty reduction after orthogonalization with the uncertainty level (Figure 3A, Figure  
279 S1K and S1L). Conversely, the IFPC activity was positively correlated with the extent of  
280 uncertainty reduction after orthogonalization with the uncertainty level in the Sudoku task  
281 (Figure 3B), but negatively in the RDM task (Figure 3B and Figure S1I). These results suggest  
282 that IFPC should be instead involved in decision adjustment to reduce decision uncertainty in  
283 redecision, in particular, in the Sudoku task. In addition, the activities of the bilateral ventral IPL  
284 regions and VMPFC were also positively correlated with the level of uncertainty reduction in  
285 both tasks (Figure S1I). The VMPFC activities appeared intrinsically anti-correlated with  
286 activities of dACC or the other regions of the metacognition network (the details about the  
287 VMPFC activities will be discussed in another study). Thus, dACC and AIC appeared  
288 specifically involved in metacognitive monitoring. Instead, IFPC appeared specifically involved  
289 in metacognitive controlling. Their functional roles in metacognition were dissociated in  
290 redecision.

291

292 The opposite regression of the IFPC activities with the extent of uncertainty reduction in the  
293 Sudoku and RDM tasks might reflect its different roles in decision adjustment in the two tasks.  
294 Decision adjustment in the perceptual decision-making tasks would merely require low-level  
295 cognitive control, for instance, paying more attention on the new sensory information in  
296 redecision, whereas that in the rule-based decision-making tasks (i.e., Sudoku solving) would  
297 require high-level cognitive control, for instance, exploring alternative solutions. In the latter  
298 case, metacognitive controlling needed more effort, and whether the problem would be better  
299 solved should be conditioned to individual intrinsic motivation to engage the metacognitive  
300 controlling process. The ventral striatum (VS) was positively correlated with the extent of  
301 uncertainty reduction in the Sudoku task, but not in the RDM task (Figure 3C). To the end, VS  
302 might encode intrinsic motivation to engage the metacognitive controlling in the Sudoku task.  
303 Critically, the IFPC activity was significantly coupled with the interaction between the VS

304 activity and the uncertainty level (Figure 3D; see PPI analysis in Materials and Methods), and the  
305 accuracy change of each participant by redecision was positively correlated with the coupling  
306 strength in the Sudoku task (Figure 3E). These results imply that the efficiency of IFPC  
307 involvement in metacognitive controlling in the rule-based decision-making tasks (Sudoku)  
308 should be conditioned to intrinsic motivation, modulated by the VS activity.

309

### 310 **Dissociation of individual metacognitive abilities of monitoring and controlling in the** 311 **metacognition network**

312

313 Metacognitive abilities of monitoring and controlling behaviorally embody in two components:  
314 uncertainty sensitivity and accuracy change, respectively. Through all sessions of fMRI and  
315 other repeated behavioral experiments, the individual uncertainty sensitivity was highly  
316 consistent between different sessions of the Sudoku task (Cronbach's  $\alpha = 0.91$ , Figure 4A, left  
317 column, upper panel) and the RDM task ( $\alpha = 0.89$ , Figure 4A, left column, middle panel), as well  
318 as across the two tasks ( $\alpha = 0.85$ , Figure 4A, left column, lower panel). In contrast, the individual  
319 accuracy change by redecision was not consistent across the two tasks ( $\alpha = 0.03$ , Figure 4A, right  
320 column, lower panel), though it was consistent between different sessions of the Sudoku task ( $\alpha$   
321 = 0.80, Figure 4A, right column, upper panel) or the RDM task ( $\alpha = 0.76$ , Figure 4A, right  
322 column, middle panel). Thus, individual metacognitive abilities of monitoring appeared reliably  
323 consistent, but those of metacognitive controlling were dissociated between the two tasks.

324

325 Intriguingly, the individual uncertainty sensitivity ( $A_{ROC}$ ) was positively correlated with the  
326 uncertainty-level regression  $\beta$  value of the fMRI signal changes primarily in the dACC and AIC  
327 regions (Figure 4B and Figure 4C upper; one tailed  $t$ -test,  $r = 0.79$ ,  $t_{19} = 5.6$ ,  $P = 6.0 \times 10^{-6}$  in the  
328 Sudoku task;  $r = 0.55$ ,  $t_{19} = 2.9$ ,  $P = 0.0049$  in the RDM task; Table S3), but not with that in the  
329 IFPC region (Figure 4B and Figure 4C bottom; one tailed  $t$ -test,  $r = 0.27$ ,  $t_{19} = 1.2$ ,  $P = 0.12$  in  
330 the Sudoku task;  $r = 0.31$ ,  $t_{19} = 1.4$ ,  $P = 0.085$  in the RDM task), commonly in both tasks. In  
331 contrast, the individual accuracy change was significantly correlated with the mean activity in  
332 the IFPC region (Figure 4D and Figure 4E bottom; one tailed  $t$ -test,  $r = 0.69$ ,  $t_{19} = 4.2$ ,  $P = 2.2 \times$   
333  $10^{-4}$  in the Sudoku task;  $r = -0.39$ ,  $t_{19} = 1.9$ ,  $P = 0.041$  in the RDM task), but not with that in the  
334 dACC region (Figure 4D and Figure 4E upper; one tailed  $t$ -test,  $r = 0.28$ ,  $t_{19} = 1.3$ ,  $P = 0.11$  in  
335 the Sudoku task;  $r = -0.02$ ,  $t_{19} = 0.09$ ,  $P = 0.47$  in the RDM task). When the IFPC activity was  
336 stronger, the accuracy change was more in the Sudoku task, but became less in the RDM task  
337 (Figure 4E). In addition, the individual accuracy change was also positively correlated with the  
338 uncertainty-level regression  $\beta$  value of the IFPC activity in the Sudoku task (Figure S4, one tailed  
339  $t$ -test,  $r = 0.70$ ,  $t_{19} = 4.3$ ,  $P = 0.00017$ ), but not in the RDM task (Figure S4, one tailed  $t$ -test,  $r = -$   
340  $0.02$ ,  $t_{19} = 0.09$ ,  $P = 0.47$ ). Thus, the dACC activity (AIC as well) commonly represented  
341 individual metacognitive abilities of monitoring, whereas IFPC differentially modulated  
342 individual metacognitive abilities of controlling in the two tasks.

343

344 The RT of option choices in the initial decision after orthogonalization with the uncertainty  
345 level remained significantly correlated with the activities of the regions in the metacognition  
346 network during the redecision phase in both tasks (Figure 5A). The  $r_{RT-uncertainty}$  strength in each  
347 participant was highly correlated with the individual uncertainty sensitivity ( $A_{ROC}$ ) of either the  
348 initial decision or the final decision, respectively (Figure 5B). After orthogonalization with the  
349 individual uncertainty sensitivity, the individual  $r_{RT-uncertainty}$  strength in the Sudoku task was also



350 significantly correlated with the uncertainty-level regression  $\beta$  value of the dACC activity, but  
351 not that of the IFPC activity (Figure 5C and 5D). As the confidence reports *per se* are subjective,  
352 the association with RT could be more objective to reflect the internal uncertain states.  
353 Altogether, these neural correlates of individual differences in metacognitive abilities further  
354 suggest that the functional roles of dACC and IFPC in metacognition should be dissociated.

355

### 356 **Task baseline activities in the metacognitive network predicting individual metacognitive** 357 **abilities of monitoring and controlling**

358

359 The regions of the metacognition network were also activated in the certain trials of both tasks  
360 (confidence level = 4), in comparison with their respective control conditions (Figure 6B and  
361 Figure S2). These activation differences might be partially caused by different subjective  
362 uncertain states between the two conditions that were not reflected by the four-scale confidence  
363 ratings (the ceiling effect). The averaged accuracy was about 80% in the certain trials of the tasks  
364 (Figure 1C), but it was about 95% in the control conditions. However, these task baseline  
365 activities in the certain trials of the tasks also reflected the individual uncertainty monitoring bias  
366 and potential abilities of efficient metacognitive controlling. The individual uncertainty  
367 monitoring bias, as estimated by averaging the uncertainty levels of the trials in each session of  
368 the tasks, representing the individual over-confident or under-confident tendency, was consistent  
369 between different sessions in the Sudoku task ( $\alpha = 0.95$ , Figure 6A, left panel), and in the RDM  
370 task ( $\alpha = 0.94$ , Figure 6A, middle panel), as well as across the two tasks ( $\alpha = 0.91$ , Figure 6A,  
371 right panel). The individual mean uncertainty level was positively correlated with the task  
372 baseline activity in the dACC region (Figure 6C and Figure 6F left; one tailed  $t$ -test,  $r = 0.50$ ,  $t_{19}$   
373 = 2.5,  $P = 0.0096$  in the Sudoku task;  $r = 0.44$ ,  $t_{19} = 2.1$ ,  $P = 0.022$  in the RDM task), but not  
374 with that in the IFPC region (Figure 6C and Figure 6F right; one tailed  $t$ -test,  $r = 0.18$ ,  $t_{19} = 0.80$ ,  
375  $P = 0.22$  in the Sudoku task;  $r = -0.04$ ,  $t_{19} = 0.17$ ,  $P = 0.43$  in the RDM task), commonly in both  
376 tasks. Meanwhile, the individual accuracy change in the Sudoku task was positively correlated  
377 with the task baseline activity in the IFPC region (Figure 6D and Figure 6G right; one tailed  $t$ -  
378 test,  $r = 0.45$ ,  $t_{19} = 2.2$ ,  $P = 0.020$ ), but not with that in the dACC region (Figure 6G left; one  
379 tailed  $t$ -test,  $r = 0.14$ ,  $t_{19} = 0.62$ ,  $P = 0.27$ ). In contrast, the individual accuracy change in the  
380 RDM task was negatively correlated the task baseline activity in the IFPC region (Figure 6E and  
381 Figure 6G right; one tailed  $t$ -test,  $r = -0.40$ ,  $t_{19} = 1.9$ ,  $P = 0.035$ ), but not with that in the dACC  
382 region (Figure 6G left; one tailed  $t$ -test,  $r = -0.13$ ,  $t_{19} = 0.57$ ,  $P = 0.29$ ). Thus, the task baseline  
383 activity in the dACC region could reflect the individual uncertainty monitoring bias in both  
384 tasks, whereas that in the IFPC region could predict the individually differential potential  
385 abilities of metacognitive controlling for decision adjustment in both tasks.

386

### 387 **Functional connectivity in the metacognition network**

388

389 Thus far we have shown that the neural system of metacognition can be dissociated into at least  
390 two subsystems: the dACC and AIC regions involved in metacognitive monitoring of decision  
391 uncertainty, and the IFPC region involved in metacognitive controlling of decision adjustment.  
392 To further elaborate the subsystems of the metacognition network, we made analyses of  
393 interregional functional connectivity in the metacognition network. By regressing out the mean  
394 activities, and the modulations by the uncertainty level, the RT and the level of uncertainty  
395 reduction, as well as their interactions, we calculated trial-by-trial correlation between each pair

396 of regions in the metacognition network (see [Materials and Methods](#)). The interregional  
397 functional connectivity patterns in both the task condition ([Figure 7A](#)) and the control condition  
398 ([Figure 7B](#)) were almost identical between the two tasks, and also similar to that at the resting  
399 state ([Figure 7C](#)). The interregional functional connectivity patterns consistently showed that the  
400 metacognition network might be divided into three subsystems: the IFPC region; the dACC and  
401 AIC regions; the DLPFC and aIPL regions. The interregional functional connectivity within each  
402 of the subsystems was considerably stronger than that across the subsystems. So far, the  
403 functional roles of the subsystem consisting of the DLPFC and aIPL regions in metacognition  
404 remain unclear. It is worthy of noting that the functional connectivity between dACC and the  
405 regions of the other two subsystems in the task conditions was slightly stronger than the  
406 corresponding one at the resting state.

407  
408

## 409 Discussion

410  
411 In the present study, we utilized a novel “decision-redecision” paradigm to examine the  
412 behavioral and neural correlates of metacognition in decision uncertainty monitoring and  
413 decision adjustment controlling during the redecision phase, in comparison with those correlates  
414 of the decision-making process during the initial decision phase. The behavioral results were  
415 similar between the two tasks, and largely contradicted the predictions by the theory that  
416 metacognition is merely based on the very same decision-making process (Vickers 1979; Kiani  
417 and Shadlen, 2009; Resulaj et al., 2009; Pleskac and Busemeyer, 2010; Kiani et al., 2014; van  
418 den Berg et al., 2016). Given a quite longer duration for accumulating more information in  
419 redecision, the divergence between the uncertainty sensitivity and the final decision accuracy  
420 remained outstanding. Instead, our robust finding from the behavioral results was that the  
421 individual uncertainty sensitivity (both  $A_{ROC}$  and  $r_{RT-uncertainty}$ ) remained markedly stable between  
422 the two consecutive decisions on the same situations, between different sessions of the same  
423 tasks, and across the tasks (Song et al., 2011), indicating that the individual uncertainty  
424 sensitivity was largely independent of the accumulating evidence and the forms of the decision-  
425 making process. This leads us to favor the alternative theory that metacognition entails a separate  
426 neural system to monitor and control the decision-making neural system (Flavell, 1979; Nelson  
427 and Narens, 1990; Dunlosky and Metcalfe, 2009; Fleming and Dolan, 2012). Using fMRI, a  
428 frontoparietal control network predominately recruited in redecision was identified. This network  
429 was involved in both metacognitive monitoring of decision uncertainty and metacognitive  
430 controlling of decision adjustment, commonly in both tasks. Therefore, we putatively referred to  
431 this network as the metacognition network, which could be probably segregated into three  
432 subsystems (Figure 7).

433  
434 The subsystem consisting of the dACC and AIC regions was involved in decision  
435 uncertainty monitoring, commonly in the tasks. The neural uncertainty sensitivity (the  
436 uncertainty-level regression  $\beta$  value of neural activity) in the two regions was highly correlated  
437 with the behavioral uncertainty sensitivity. Further, their task baseline activities could predict the  
438 individual uncertainty bias. Thus, the subjective uncertainty level could be represented by the  
439 dACC and AIC activities, which could transform or read out the uncertainty information from  
440 the different decision-making processes (Kepecs et al., 2008; Kiani and Shadlen, 2009;  
441 Middlebrooks and Sommer, 2012; Komura et al., 2013; Pouget et al., 2016). Although the fMRI  
442 signals of the decision-making neural system in the initial decision were not directly correlated  
443 with the uncertainty level (Pouget et al., 2016), the observation that the correlation of RT with  
444 uncertainty was significant and stable indicates that participants should be aware of decision  
445 uncertainty during choices. Together, we infer that uncertainty monitoring might be indeed  
446 consisted of two-order processes, the first-order process might coincide the decision-making  
447 process to bring out the uncertainty information (Vickers 1979; Kiani and Shadlen, 2009; Resulaj  
448 et al., 2009; Pleskac and Busemeyer, 2010; Kiani et al., 2014; van den Berg et al., 2016), and the  
449 second-order process might transform the uncertainty information from different decision-  
450 making processes into a common subjective feeling, encoding in the dACC and AIC regions.  
451 This hypothesis then integrates the two previous theories together and consistently accounts for  
452 the observed evidences from both sides. It is worthy of noting that our results were different  
453 from the previously neuroanatomical studies showing that the IFPC region was associated with  
454 the individually behavioral uncertainty sensitivity (Fleming et al., 2010; Fleming et al., 2014).

455

456 The dACC and AIC regions have been well recognized in involving conflict and error  
457 monitoring of the cognitive processes to signal the need for further control (Botvinick et al.,  
458 2001; Ridderinkhof et al, 2004; Shenhav et al., 2013). Here we demonstrated that it was decision  
459 uncertainty, rather than decision errors, to be served as the primary signal to be monitored (Wan  
460 et al., 2016). While conflict situations often but not necessarily cause uncertainty, it needs further  
461 studies to confirm whether the uncertainty information should be also critical in conflict  
462 situations. The dACC and AIC regions are shown to broadly monitor subjective feelings of such  
463 as pains, emotions and others (Craig, 2009). Critically, the salient information to elicit conscious  
464 monitoring in these regions is not necessarily from the somatosensory stimulation (Singer et al.,  
465 2004). Similarly, the prospective monitoring of uncertainty in judgments of learning (JOL) and  
466 feeling-of-knowing (FOK) also activated these regions, prior to execution of the decision-making  
467 tasks (Maril et al., 2001). Therefore, the decision uncertainty monitoring in the dACC and AIC  
468 regions should be domain-general, commonly for different forms of decision-making tasks. In  
469 turn, the uncertainty sensitivity is a unique and core trait of each individual decision maker,  
470 dependent on the circuit of the dACC and AIC regions (Craig, 2009).

471

472 Decision uncertainty monitoring could be a bottom-up process. It automatically occurred  
473 even with no requirement for redecision (fMRI3, Figure S1G; Wan et al., 2016). However, the  
474 subsequent decision adjustment should need top-down cognitive control. The activities of IFPC,  
475 rather than dACC or AIC, were positively associated with the extent of uncertainty reduction and  
476 the accuracy change by redecision in the Sudoku task, suggesting that the IFPC subsystem  
477 should be critically involved in metacognitive controlling, in particular, in the Sudoku task.  
478 Uncertainty-driven exploration could be a critical process in metacognitive controlling (Yoshida  
479 and Ishii, 2006; Daw et al., 2006; Boorman et al., 2009; Badre et al., 2012; Wan et al., 2016). To  
480 revise the foregone decisions often needs exploration of alternatives by finding an alternative  
481 solution approach, since the same solution approach as previously used in the preceding decision  
482 would very likely lead to the same solution. Thus, strategy management could be the key  
483 function of IFPC involvement in the metacognitive controlling. This top-down strategic signal  
484 might regulate the activities in the other frontal cortical areas and the posterior parietal cortex, to  
485 execute the processes of altering the previous uncertain choice (Yoshida and Ishii, 2006; Badre  
486 et al., 2012; Wan et al., 2016), or to explore a non-default option (Daw et al., 2006; Boorman et  
487 al., 2009).

488

489 Cognitive control is in general effortful (Westbrook and Braver, 2016). Decision makers  
490 tend to avoid making decisions on the tasks that are more cognitive demanding (McGuire and  
491 Botvinick, 2010), or to choose less systematic or more own suitable strategies to make decisions  
492 (Beach and Mitchell, 1978; Matthews et al., 1980). The metacognitive controlling in redecision to  
493 better solve the Sudoku problems needed the participants' effort to engage. Since there were no  
494 external incentives to motive them to do so in the task, their engagement in metacognitive  
495 controlling should be driven by their intrinsic motivation, or curiosity. That is, to know the truth.  
496 The VS activities seem to encode this intrinsic motivation to reduce decision uncertainty, and to  
497 facilitate IFPC engagement in metacognitive controlling. This implies that dopamine might play  
498 a critical role in the IFPC activity involving in metacognitive controlling (Westbrook and Braver,  
499 2016). How the intrinsic motivation and external incentive interacts with metacognitive  
500 controlling remains quite intriguing, and is a very important issue in education (Morgan, 1984).

501 Alternatively, the VS activity that was positively correlated with the extent of uncertainty  
502 reduction might represent the progress of processes to achieve the goal (i.e., problem solution)  
503 through redecision (Howe et al., 2013).

504  
505 It should then be much expected that IFPC would be not involved in metacognitive  
506 controlling in the RDM task, as revising the preceding perceptual decision may need no more  
507 than attention on the stimuli in redecision to accumulate new information, rather than exploration  
508 of alternative options. However, the IFPC activity remained activated too, and was negatively  
509 correlated with extent of uncertainty reduction and the accuracy change. This implies that the  
510 process of exploration in IFPC might be competitive with the simultaneous process of  
511 exploitation in the posterior brain areas when these two-level systems were not coordinated  
512 (Daw et al., 2005). Indeed, the FPC lesion on non-human primates enhanced the animals'  
513 performance of a well-learned decision-making task (Mansouri et al., 2015). However, it remains  
514 enigmatic that IFPC was kept activated when it was not necessary and would not facilitate the  
515 engaging task. Presumably, the dACC control signals driven by decision uncertainty might non-  
516 selectively activate IFPC. The automaticity of eliciting IFPC involvement in metacognitive  
517 controlling may enhance uncertainty resolution in majority of difficult real-world situations, to  
518 relieve effort for engagement in metacognitive controlling, but failure of disentanglement  
519 however could impair the performance adjustment in simple tasks.

520  
521 The Metacognitive controlling is a form of cognitive control, but not all forms of cognitive  
522 control are metacognitive. Although the Sudoku and RDM tasks appeared very different, to our  
523 surprise, the fMRI activation patterns associated with the decision-making process were quite  
524 similar between the two tasks. Critically, IFJ at the posterior PFC was commonly activated. IFJ  
525 is ubiquitously engaged in online task execution, involved in cognitive control (Brass et al.,  
526 2005; Duncan, 2010) and attention (Baldauf and Desimone, 2014). Thus, IFJ might play a  
527 critical role of object-level cognitive control generally in different decision-making tasks  
528 (Heekeren et al, 2006; Ho et al., 2009; Wan et al., 2016). The separation of the meta-level  
529 cognitive control in the anterior PFC and the object-level cognitive control in the posterior PFC  
530 is aligned with the hypothesis of the rostrocaudal functional division in the PFC (Koechlin and  
531 Summerfield, 2007; Badre and D'Esposito, 2007; Wan et al., 2016).

532  
533 There were some potential pitfalls for the fMRI data analyses in the current study. As the  
534 metacognition process should automatically accompany the decision-making process with  
535 uncertainty, it excludes the conventional techniques of fMRI paradigms to insert time jitters of  
536 blank between the initial decision phase and the redecision phase. Thus, generally speaking, the  
537 two events of the decision-making process and the metacognition process in the general linear  
538 models (GLM) could be collinear, and result in inflations of standard errors of the estimated  
539 parameters, in particular, for the regions to be involved in both processes. Fortunately, for the  
540 regions of interest involved in metacognition, consistent with our predictions, their activations  
541 predominately appeared in redecision. Actually, the variance inflation factor (VIF) was about  
542 2.4, suggesting the collinearity of the GLM models was not severe.

543  
544 In summary, decision-making is usually accompanied by uncertainty. The subsequent  
545 decision uncertainty monitoring and decision adjustment tend to be automatically elicited by  
546 uncertainty. Thus, decision-making might be usually accompanied by metacognition, and the two

547 processes are sequentially coupled together. However, the neural system of metacognition  
548 remains largely unclear so far, and was often misattributed to the decision-making process. For  
549 the first time, to the best of our knowledge, we here constructed the extent and generality of the  
550 functional architecture of the metacognition neural system in the PFC, separate from the  
551 decision-making neural system (Figure 8). The metacognition neural system is comprised of the  
552 metacognitive monitoring system and the metacognitive controlling system. The metacognitive  
553 monitoring system consisting of the dACC and AIC regions are domain-general. It reads out the  
554 uncertainty information from the decision-making process and quantitatively encodes the  
555 subjective uncertainty states. The metacognitive controlling system of the IFPC region  
556 implements high-level cognitive control (e.g., strategy), dominantly in the rule-based and  
557 abstract inference tasks (e.g., the Sudoku task), and might compete with low-level cognitive  
558 control (e.g., attention), dominantly in the perceptual tasks (e.g., the RDM task). The high-level  
559 cognitive control by the IFPC region is modulated by intrinsically motivational signals from the  
560 VS region. These two subsystems sequentially monitor and control the decision-making system,  
561 which is presumingly controlled by the IFJ region. The functions of the third subsystem of the  
562 DLPFC and aIPL regions remain to be explored in the future. Thus, the decision-making neural  
563 system and the metacognition neural system construct a closed-loop system to control and adapt  
564 our behaviors toward the task goals. Finally, Further deepening our understanding of the  
565 metacognition neural system will facilitate us to optimize the strategies for individual efficient  
566 learning and decision-making (Koriat, 1997), and help us reveal causes of metacognitive  
567 disorders in neuropsychiatric diseases (David, 1990; Dunlosky and Metcalfe, 2009).

## 568 **Materials and Methods**

569

570 **Participants.** All participants were university students, who were recruited through campus  
571 bulletin board system (BBS). Informed consent was obtained from each individual participant in  
572 accordance with a protocol approved by Beijing Normal University Research Ethics Committee.  
573 21 participants (19-33 years old, 12 female) took part in the main fMRI experiment (fMRI1) and  
574 the resting fMRI experiment. Out of them, 16 participants (19-33 years old, 9 female) took part  
575 in all sessions of the repeated behavioral experiments. In addition, 17 participants (19-25 years  
576 old, 10 female) took part in the second fMRI experiment (fMRI2), and 25 participants (19-27  
577 years old, 14 female) took part in the third fMRI experiment (fMRI3).

578

579 **RDM task.** In an aperture with the radius of three degrees (visual angle), hundreds of white dots  
580 (radius: 0.08 degrees, density: 2.0%) were moving toward different directions with a speed of 8.0  
581 degrees/second under a black background. The lifetime of each dot lasted for three frames. A  
582 part of dots were moving toward the same direction (one of the four directions: Left, Down,  
583 Right and Up), but the others were moving toward different random directions. The participant  
584 was required to discriminate the net motion direction. According to the proportion of coherently  
585 moving dots, the discrimination difficulty was classified into ten levels (Figure 1B), of which the  
586 coherences varied from 1.6% to 51.2%, whereas the coherence of moving dots in the control  
587 condition was 100%.

588

589 **Sudoku Task.** In a  $4 \times 4$  grid matrix, each digital number from 1 to 4 should be filled once and  
590 only once in each column, each row, and each corner with four grids. The task used in the  
591 present study was to fill in a target grid with a digital number from 1 to 4 in a partially completed  
592 Sudoku problem. Each problem had a unique solution. A Sudoku generator (custom codes)  
593 created thousands of different Sudoku problems. According to the minimum numbers of logic  
594 operation steps to arrive at the solutions, the problem difficulties were classified into ten levels,  
595 which largely matched with the participants' subjective difficulty levels (Figure 1B). In the  
596 control condition, the presented problem was comprised of symbols ('#') in replace of the digital  
597 numbers other than that in the target grid where the digital number was illustrated. Thus, the  
598 participant only needed to press the corresponding button.

599

600 **Learning procedure.** The participant learned the cognitive skills to solve the  $4 \times 4$  Sudoku  
601 problems under the experimenters' guidance for at least two hours per day in continuous four  
602 days. The participant first practiced to solve problems with free time in 2-4 runs, each of which  
603 comprised 40 problems at a certain difficulty level. Once the average accuracy of that session  
604 crossed over 90%, he/she then practiced to solve the problems at the same level in 2 s. Once the  
605 average accuracy of the run was over 70% in the time-limited task, the participant then repeated  
606 the above procedure with a task difficulty level upgraded. After four-day intensive training, each  
607 participant attained a high-level proficiency to solve the  $4 \times 4$  Sudoku problems in 2 s, as the  
608 mean task difficulty finally approached about the fifth level.

609 **Task sequences.** The sequences of both Sudoku and RDM tasks were identical. In fMRI1, each  
610 trial started with a green cross cue to indicate that the task stimulus would be presented 1 s later.  
611 The stimulus was presented for 2 s, and then four options were presented and the participant  
612 made a choice in 2 s. After an option was chosen, four confidence levels from 1 (lowest) to 4

613 (highest) were presented and the participant reported the confidence in 2 s. The same stimulus  
614 was immediately presented again for 4 s, and then the participant selected a choice and reported  
615 the confidence level again. Each trial lasted for 15 s. The control trials were intermingled with  
616 the task trials. The sequence of the control trials was identical to that of the task trials. In each  
617 task, there were 4 runs and each run consisted of 30 task trials and 10 control trials. The task  
618 difficulty of each trial was adjusted by a staircase procedure through which one level was  
619 upgraded after two consecutive correct trials and one level was downgraded after two  
620 consecutive erroneous trials, and kept as the same otherwise, so that the mean accuracy was  
621 converged to about 50%. Prior to each experiment, two runs were carried out for each participant  
622 to practice and to stabilize performance. The Sudoku problems used in the learning and practice  
623 sessions were different from those used in the fMRI and behavioral experiments. In addition, a  
624 ten-minute resting fMRI experiment was conducted when the participant was in a resting state  
625 with eyes opened.

626 The second fMRI experiment (fMRI2, [Figure 3](#) and [Figure S1C](#)) was carried out to examine  
627 whether the metacognition network would be also essentially involved in the cognitive processes  
628 of the initial decision, when a new Sudoku problem or RDM stimulus was presented for decision  
629 at the first time during the redecision phase, following the control conditions in the decision  
630 phase. In the decision phase, all situations were those as used in the control conditions of fMRI1.  
631 In the redecision phase, the same control situations appeared in a half of trials and new Sudoku  
632 problems (or RDM) stimuli appeared in the other half of trials. These two cases appeared  
633 randomly in the redecision phase. The new Sudoku problems (or RDM) stimuli used in the  
634 experiment were selected from those in which each individual participant would mostly make  
635 confirmative choices, that is, the confidence ratings were predominately 4. The task sequence  
636 was same as used in fMRI1. In total, there were 120 trials across two runs.

637 The third fMRI experiment (fMRI3, [Figure 2D](#) and [Figure S1E](#)) was carried out to compare  
638 brain activities in the redecision condition (required to make a decision on the foregone situation  
639 again) with those in the non-redecision condition (not required to make a decision on the  
640 foregone situation again) following the initial decisions in both Sudoku and RDM tasks. The task  
641 sequence was very similar as used in fMRI1, but the presentation time of the stimulus was 3 s  
642 during the redecision phase. The stimuli used in the non-redecision condition during the second  
643 phase were those used in the control condition in each task. In each task, both the redecision and  
644 non-redecision conditions were randomly intermingled, and each consisted of 60 trials across 3  
645 runs.

646 In the fMRI experiments, the participants viewed images of the stimuli on a rear-projection  
647 screen through a mirror (resolution,  $1024 \times 768$  pixels; refresh rate, 60 Hz). Normal or corrected-  
648 to-normal vision was achieved for each participant. All images were restricted to 3 degrees  
649 surrounding the fixation cross.

650  
651 **fMRI experiments.** All fMRI experiments were conducted using a 3 T Siemens Trio MRI  
652 system with a 12-channel head coil (Siemens, Germany) after the four-day Sudoku training.  
653 Functional images were acquired with a single shot gradient echo  $T_2^*$  echo-planar imaging (EPI)  
654 sequence with volume repetition time (TR) of 2 s, echo time (TE) of 30 ms, slice thickness of 3.0  
655 mm and in-plane resolution of  $3.0 \times 3.0$  mm<sup>2</sup> (field of view [FOV]:  $19.2 \times 19.2$  cm<sup>2</sup>; flip angle  
656 [FA]: 90 degrees). Thirty-eight axial slices were taken, with interleaved acquisition, parallel to  
657 the anterior commissure-posterior commissure (AC-PC) line.

658



659 **Behavioral experiments.** To test the reliability of the participants' metacognitive abilities,  
660 behavioral experiments were carried out using same paradigms of the Sudoku and RDM tasks.  
661 Each of the participants repeatedly participated 6 sessions of the behavioral experiments in  
662 different days. Each session was comprised of 4 runs of the Sudoku task and 4 runs of the RDM  
663 task, as same as those of fMRI1.

664  
665 **Behavioral data analyses.** A nonparametric approach was employed to assess each participant's  
666 uncertainty sensitivity. The receiver operating characteristic (ROC) curve was constructed by  
667 characterizing the incorrect probabilities under different uncertainty levels of the first decisions.  
668 The area under curve (AUC) was calculated to represent how well the participant was sensitive  
669 to their decision uncertainty (Fleming et al., 2010). The individual uncertainty bias was estimated  
670 by the mean uncertainty level of each session, regressed out the factor of  $A_{ROC}$ . The accuracy  
671 change was the change of mean accuracy from the first decision to the second decision. The  
672 individual uncertainty sensitivity and uncertainty bias, as well as accuracy change, were  
673 calculated for each session of the fMRI and behavioral experiments.

674  
675 **fMRI analyses.** The analysis was conducted with FMRIB's Software Library (FSL, Smith et al.,  
676 2004). To correct for the rigid head motion, all EPI images were realigned to the first volume of  
677 the first scan. Data sets in which the translation motions were larger than 2.0 mm or the rotation  
678 motions were larger than 1.0 degree were discarded. It turned out that no data discarded in the  
679 fMRI experiments. The EPI images were first aligned to individual high-resolution structural  
680 images, and were then transformed to the Montreal Neurological Institute (MNI) space by using  
681 affine registration with 6 degrees of freedom and resampling the data with a resolution of  $2 \times 2 \times$   
682  $2 \text{ mm}^3$ . A spatial smoothing with a 4-mm Gaussian kernel (full width at half-maximum) and a  
683 high-pass temporal filtering with a cutoff of 0.005 Hz were applied to all fMRI data.

684 Each trial was modeled with three regressors: the first regressor representing the first  
685 decision was time-locked to the onset of the first stimuli presentation with summation of the  
686 presentation time (2 s) and the differential RT from the mean RT of control trials as the event  
687 duration; the second regressor representing the second decision (redecision) was time-locked to  
688 the onset of the first confidence judgment, with summation of the confidence report, the second  
689 presentation time (4 s) of the stimuli and the differential RT from the mean RT of control trials  
690 as the event duration; the third regressor representing the baseline during the inter-trial intervals  
691 (ITI) was time-locked to the onset of ITI with the ITI duration as the event duration. The  
692 uncertainty level, the RT and the level of uncertainty reduction (differences of the uncertainty  
693 level between the final decision and the initial decision) were implemented as modulators of the  
694 second regressor (redecision) by demeaning the variances of the uncertainty level (Figure 2C)  
695 and consequently orthogonalizing the RT and the level of uncertainty reduction with each other  
696 (Figure 2A-C and Figure S1I), or reversing the orthogonalization order (Figure S1J).

697 For group level analysis, we used FMRIB's local analysis of mixed effects (FLAME),  
698 which model both "fixed effects" of within-participant variance and "random effects" of  
699 between-participant variance using Gaussian random-field theory. Statistical parametric maps  
700 were generated by a threshold with  $P < 0.05$  with false discovery rate (FDR) correction, unless  
701 noted otherwise. The regressions of the individual uncertainty sensitivity ( $A_{ROC}$ ), the individual  
702 RT-uncertainty correlation coefficient, the individual mean uncertainty level and the individual  
703 accuracy change with the  $\beta$  weights of uncertainty levels (Figure 4B, Figure 4D, and Figure  
704 S5C), or with the task baseline activities (Figure 5C-E), were calculated at the third-level of

705 group analyses. For these analyses, Statistical parametric maps were generated by a threshold  
706 with  $P < 0.005$  with the cluster-size threshold as 20.

707

708 **ROI analyses.** The region-of-interest (ROIs) of the metacognition network were defined by the  
709 voxels that were significantly activated during the redecision phase in the task trials compared to  
710 those during the same phase in the control trials across both tasks using conjunction analysis ( $P$   
711  $< 0.005$ , cluster-wise correction; green areas in statistical parametric maps). ROI analyses were  
712 obtained from both hemispheres of the same region. The ventral striatum (VS) ROI was  
713 anatomically defined by the striatum atlas of FSL templates (Patenaude et al., 2011). The time  
714 courses were derived from the ROIs, calculating a mean time course within a ROI in each  
715 participant individually. We then averaged the time courses of the same condition across the  
716 participants (Figure S2 and Figure S3), or oversampled the time course by 10 and created epochs  
717 from the beginning of an event onward and applied a GLM to every pseudo-sampled time point  
718 separately. By averaging the  $\beta$  weights across participants we created the time courses shown in  
719 Figure 3. Standard errors of mean (S.E.M.) were calculated between participants.

720

721 **PPI analysis.** The physiology-psychological interaction (PPI) analysis (Figure 3D) was  
722 conducted with the demeaned VS time courses after removing the mean activity and the  
723 component correlated with the uncertainty level as the physiological factor, and the uncertainty  
724 level convolved with the canonical hemodynamic response function (HRF) during the redecision  
725 phase as the psychological factor. The two factors *per se* and the interaction between the two  
726 factors, as confound regressors, were put together into a new GLM analysis across the whole  
727 brain.

728

729 **Functional connectivity analyses.** Functional connectivity analyses were independently  
730 conducted for the task and resting fMRI data. For the task fMRI data, of each ROI, the residual  
731 time courses after regressed out the mean activity and the components associated with the  
732 uncertainty level, the RT, the level of uncertainty reduction and their interactions, were averaged  
733 across the voxels of the region and segmented into the individual trials of the task and control  
734 conditions in the Sudoku and RDM task, respectively. The segmented data of each trial were  
735 then modeled using a single regressor during the redecision phase convolved with the canonical  
736 HRF and then a regression value was obtained for each trial. The correlation coefficient of the  
737 regression values between each pair of the ROIs in the metacognition network was calculated  
738 across the trials of the task or control condition in each participant. Finally, the averaged  
739 correlation coefficients were shown (Figure 7A and 7B). For the resting fMRI data, the standard  
740 processing was carried out (Fox et al., 2005), and the averaged correlation coefficients were  
741 shown (Figure 7C).

742

743

744 **Authors contributions:** L.Q., Y.N. and J.S. conducted the experiments; J.S. and X.W. analyzed  
745 the fMRI data; J.S. and X.W. designed the experiments; X.W. wrote the manuscript. X.W. and  
746 X.L. supervised the project.

747

748

749 **Acknowledgements:** We thank Wenbin Jia, Xuesong Zhang, Sidong Wang for technical  
750 assistance and Dr. Kang Cheng for comments on the manuscript. This research was funded by  
751 the National Natural Science Foundation of China (No. 31471068 to X.W.; No. 61273063 to  
752 X.L.), Key Program for International S&T Cooperation Projects of China (MOST,  
753 2016YFE0129100, X.W.), partially supported by “the Fundamental Research Funds for the  
754 Central Universities (2017EYT33, X.W.), and the Thousand Talents Program for Distinguished  
755 Young Scholars (X.W.).

756

757

758 **References**

- 759 Badre, D., and D'Esposito, M. (2007) Functional magnetic resonance imaging evidence for a  
760 hierarchical organization of the prefrontal cortex. *J. Cogn. Neurosci.* *19*, 2082–2099.
- 761 Badre, D., Doll, B.B., Long, N.M., and Frank, M.J. (2012) Rostrolateral prefrontal cortex and  
762 individual differences in uncertainty-driven exploration. *Neuron* *73*, 595–607.
- 763 Baldauf, D., and Desimone, R. (2014) Neural mechanisms of object-based attention. *Science*  
764 *344*, 424–427.
- 765 Beach, L.R., and Mitchell, T.R. (1978) A contingency model for the selection of decision  
766 strategies. *Acad. Manage. Rev.* *3*, 439–449.
- 767 Brass, M., Derrfuss, J., Forstmann, B., and von Cramon, D.Y. (2005) The role of the inferior  
768 frontal junction area in cognitive control. *Trends Cogn. Sci.* *9*, 314–316.
- 769 Boorman, E.D., Behrens, T.E.J., Woolrich, M.W., and Rushworth, M.F. (2009) How green is the  
770 grass on the other side? Frontopolar cortex and the evidence in favor of alternative courses of  
771 action. *Neuron* *62*, 733–743.
- 772 Botvinick, M.M., Braver, T.S., Barch, D.M., Carter, C.S. and Cohen, J.D. (2001) Conflict  
773 monitoring and cognitive control. *Psychol. Rev.* *108*, 624–652.
- 774 Buschman, T.J., and Miller, E.K. (2007) Top-down versus bottom-up control of attention in the  
775 prefrontal and posterior parietal cortices. *Science* *315*, 1860–1862.
- 776 Chua, E.F., Schacter, D.L., Rand-Giovannetti, E., and Sperling, R.A. (2006) Understanding  
777 metamemory: neural correlates of the cognitive process and subjective level of confidence in  
778 recognition memory. *NeuroImage* *29*, 1150–1160.
- 779 Craig, A.D. (2009) How do you feel-now? the anterior insula and human awareness. *Nat. Rev.*  
780 *Neurosci.* *10*, 59–70.
- 781 David, A.S. (1990) Insight and psychosis. *Brit. J. Psychiat.* *156*, 798–808.
- 782 Daw, N.D., O'Doherty, J.P., Dayan, P., Seymour, B., and Dolan, R.J. (2006) Cortical substrates  
783 for exploratory decisions in humans. *Nature* *441*, 876–879.
- 784 Daw, N.D., Niv, Y. and Dayan, P. (2005) Uncertainty-based competition between prefrontal and  
785 dorsolateral striatal systems for behavioral control. *Nat. Neurosci.* *8*, 1704–1711.
- 786 Del Cul, A., Dehaene, S., Reyes, P., Bravo, E., and Slachevsky, A. (2009) Causal role of  
787 prefrontal cortex in the threshold for access to consciousness. *Brain* *132*, 2531–2540.
- 788 Duncan, J. (2010) The multiple-demand (MD) system of the primate brain: Mental programs for  
789 intelligent behaviour. *Trends Cogn. Sci.* *14*, 172–179.
- 790 Dunlosky, J., and Metcalfe, J. (2009) *Metacognition* (Sage Publications Inc, Thousand Oaks).
- 791 Flavell, J. (1979) Metacognition and cognitive monitoring: a new area of cognitive  
792 developmental inquiry. *Am. Psychol.* *34*, 906–911.
- 793 Fleming, S.M., Weil, R.S., Nagy, Z., Dolan, R.J., and Rees, G. (2010) Relating introspective  
794 accuracy to individual differences in brain structure. *Science* *329*, 1541–1543.

- 795 Fleming, S.M., and Dolan, R.J. (2012) The neural basis of metacognitive ability. *Philos. Trans.*  
796 *R. Soc. Lond. B Biol. Sci.* **367**, 1338–1349.
- 797 Fleming, S.M., Huijgen, J., and Dolan, R.J. (2012) Prefrontal contributions to metacognition in  
798 perceptual decision-making. *J. Neurosci.* **32**, 6117–6125.
- 799 Fleming, S.M., Ryu, J., Golfinos, J.G., Blackmon, K.E. (2014) Domain-specific impairment in  
800 metacognitive accuracy following anterior prefrontal lesions. *Brain* **137**, 2811–2822.
- 801 Fleming, S.M. (2016) Changing our minds about changes of mind. *eLife*, **5**, e14790.
- 802 Fox, M.D., Snyder, A.Z., Vincent, J.L., Corbetta, M., Van Essen, D.C. and Raichle, M.E. (2005)  
803 The human brain is intrinsically organized into dynamic, anticorrelated functional networks.  
804 *Proc. Natl. Acad. Sci. U.S.A.* **102**, 9673–9678.
- 805 Gold, J.I., and Shadlen, M.N. (2007). The neural basis of decision making. *Annu. Rev. Neurosci.*  
806 **30**, 535–574.
- 807 Heekeren, H., Marrett, S., Ruff, D., Bandettini, P. and Ungerleider, L. (2006) Involvement of  
808 human left dorsolateral prefrontal cortex in perceptual decision making is independent of  
809 response modality. *Proc. Natl Acad. Sci. USA* **103**, 10023–10028.
- 810 Ho, T.C., Brown, S., and Serences, J.T. (2009) Domain general mechanisms of perceptual  
811 decision making in human cortex. *J. Neurosci.* **29**, 8675–8687.
- 812 Howe, M.W., Tierney, P.L., Sandberg, S.G., Phillips, P.E.M., and Graybiel, A.M. (2013)  
813 Prolonged dopamine signaling in striatum signals proximity and value of distant rewards.  
814 *Nature* **500**, 575–579.
- 815 Kepecs, A., Uchida, N., Zariwala, H.A., and Mainen, Z.F. (2008) Neural correlates, computation  
816 and behavioural impact of decision confidence. *Nature* **455**, 227–231.
- 817 Kiani, R., and Shadlen, M. (2009) Representation of confidence associated with a decision by  
818 neurons in the parietal cortex. *Science* **324**, 759–764.
- 819 Kiani, R., Corthell, L., and Shadlen, M.N. (2014) Choice certainty is informed by both evidence  
820 and decision time. *Neuron* **84**, 1329–1342.
- 821 Kikyo, H., Ohki, K., and Miyashita, Y. (2002) Neural correlates for feeling-of knowing: an fMRI  
822 parametric analysis. *Neuron* **36**, 177–186.
- 823 Koechlin, E., and Summerfield, C. (2007) An information theoretical approach to prefrontal  
824 executive function. *Trends Cogn. Sci.* **11**, 229–235.
- 825 Komura, Y., Nikkuni, A., Hirashima, N., Uetake, T., and Miyamoto, A. (2013) Responses of  
826 pulvinar neurons reflect a subject’s confidence in visual categorization. *Nat. Neurosci.* **16**,  
827 749–755.
- 828 Koriat, A. (1997) Monitoring one’s own knowledge during study: a cue-utilization approach to  
829 judgments of learning. *J. Exp. Psychol. Gen.* **126**, 349–370.
- 830 Kunimoto, C., Miller, J., and Pashler, H. (2001) Confidence and accuracy of near-threshold  
831 discrimination responses. *Conscious. Cogn.* **10**, 294–340.
- 832 Lau, H.C., and Passingham, R.E. (2006) Relative blindsight in normal observers and the neural  
833 correlate of visual consciousness. *Proc. Natl. Acad. Sci. USA* **103**, 18763–18769.

- 834 Levitt, H. (1971) Transformed up-down methods in psychoacoustics. *J. Acoust. Soc. Am.* *49*,  
835 467–477.
- 836 Mansouri, F., Buckley, M. J., Mahboubi, M., and Tanaka, K. (2015) Behavioral consequences of  
837 selective damage to frontal pole and posterior cingulate cortices. *Proc. Natl Acad. Sci. USA*,  
838 *112*, E3940–3949.
- 839 Mathews, N., Hunt, E., and MacLeod, C.M. (1980) Strategy choice and strategy training in  
840 sentence-picture verification. *J. Verbal. Learn. Verbal. Behav.* *19*, 531–548.
- 841 McGuire, J.T., and Botvinick, M.M. (2010) Prefrontal cortex, cognitive control, and the  
842 registration of decision costs. *Proc. Natl Acad. Sci. USA* *107*, 7922–7926.
- 843 Middlebrooks, P.G., and Sommer, M.A. (2012) Neuronal Correlates of Metacognition in Primate  
844 Frontal Cortex. *Neuron* *75*, 517–530.
- 845 Morgan, M. (1984) Reward-induced decrements and increments in intrinsic motivation. *Rev.*  
846 *Educ. Res.* *54*, 5–30.
- 847 Nelson, T.O., and Narens, L. (1990) Metamemory: a theoretical framework and new findings.  
848 *Psychol. Learn. Motiv.: Adv. Res. Theory* *26*, 125–173.
- 849 Patenaude, B., Smith, S.M., Kennedy, D.N. and Jenkinson, M.A. (2011) Bayesian model of  
850 shape and appearance for subcortical brain segmentation. *NeuroImage* *56*, 907–922.
- 851 Resulaj, A., Kiani, R., Wolpert, D.M., and Shadlen, M.N. (2009) Changes of mind in decision-  
852 making. *Nature* *461*, 263–266.
- 853 Ridderinkhof, K.R., Ullsperger, M., Crone, E.A., and Nieuwenhuis, S. (2004) The role of the  
854 medial frontal cortex in cognitive control. *Science* *306*, 443–447.
- 855 Rounis, E., Maniscalco, B., Rothwell, J., Passingham, R., and Lau, H. (2010) Theta-burst  
856 transcranial magnetic stimulation to the prefrontal cortex impairs metacognitive visual  
857 awareness. *Cogn. Neurosci.* *1*, 165–175.
- 858 Rushworth, M.F., Noonan, M.P., Boorman, E.D., Walton, M.E., and Behrens, T.E. (2011)  
859 Frontal cortex and reward-guided learning and decision-making. *Neuron* *70*, 1054–1069.
- 860 Shenhav, A., Botvinick, M.M., and Cohen, J.D. (2013) The expected value of control: an  
861 integrative theory of anterior cingulate cortex function. *Neuron* *79*, 217–240.
- 862 Shimamura, A.P. (2008) A neurocognitive approach to metacognitive monitoring and control. In  
863 *Handbook of memory and metamemory: essays in honor of Thomas O. Nelson*, Dunlosky, J.,  
864 and Bjork, R. eds. (Psychology Press, New York), pp. 373–390.
- 865 Singer, T., Seymour, B., O’Doherty, J., Kaube, H., Dolan, R.J., and Frith, C.D. (2004) Empathy  
866 for pain involves the affective but not sensory components of pain. *Science* *303*, 1157–1062.
- 867 Smith S. M. et al. (2004) Advances in functional and structural MR image analysis and  
868 implementation as FSL. *Neuroimage* *23*, S208–219.
- 869 Song, C., Kanai, R., Fleming, S.M., Weil, R.S., Schwarzkopf, D.S., and Rees, G. (2011) Relating  
870 interindividual differences in metacognitive performance on different perceptual tasks.  
871 *Conscious Cogn* *20*, 1787–1792.

- 872 van den Berg, R., Anandalingam, K., Zylberberg, A., Kiani, R., Shadlen, M.N., and Wolpert, D.  
873 M. (2016) A common mechanism underlies changes of mind about decisions and confidence.  
874 *eLife* 5, e12192.
- 875 Vickers, D. (1979). *Decision Processes in Visual Perception*. (New York: Academic Press).
- 876 Wan, X., Cheng, K., and Tanaka, K. (2016) The neural system of post-decision evaluation in  
877 rostral frontal cortex during problem solving tasks. *eNeuro* 3, e0188–16.
- 878 Westbrook, A., and Braver, T.S. (2016) Dopamine does double duty in motivating cognitive  
879 effort. *Neuron* 89, 695–710.
- 880 Wilimzig, C., Tsuchiya, N., Fahle, M., Einhäuser, W., and Koch, C. (2008) Spatial attention  
881 increases performance but not subjective confidence in a discrimination task. *J. Vis.* 8, 1–10.
- 882 Yeung, N., and Summerfield, C. (2014) Shared mechanisms for confidence judgments and error  
883 detection in human decision making. In *The cognitive neuroscience of metacognition*,  
884 Fleming, S. M., and Frith, C. D. Eds. (Springer-Verlag Berlin Heidelberg), pp 147–167.
- 885 Yoshida, W., and Ishii, S. (2006) Resolution of uncertainty in prefrontal cortex. *Neuron* 50, 781–  
886 789.
- 887 Yu, S., Pleskac, T.J., and Zeigenfuse, M.D. (2015) Dynamics of postdecisional processing of  
888 confidence. *J. Exp. Psychol.* 144, 489–510.

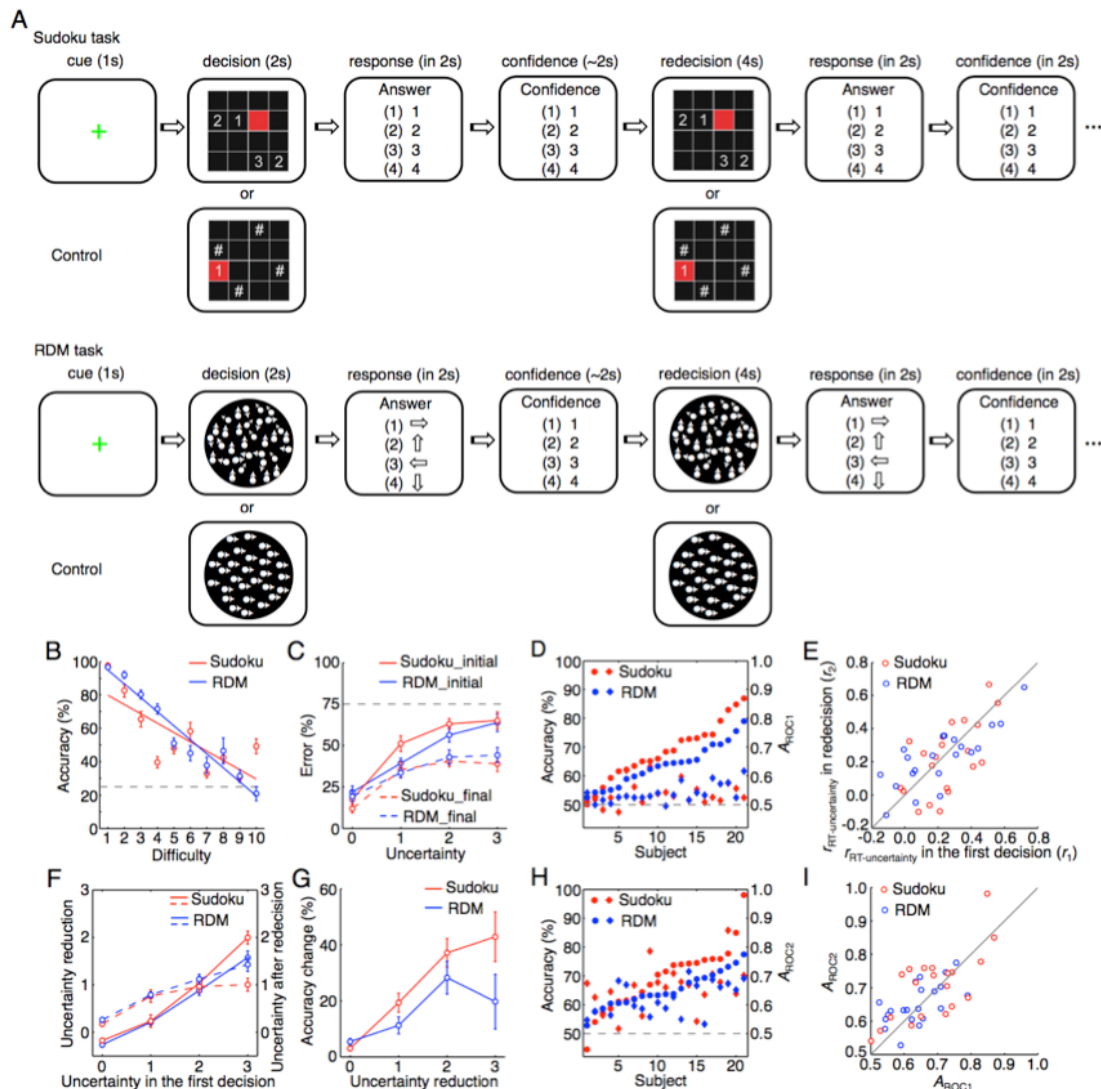

889

890

891

892 **Figure 1.** The “decision-redecision” paradigm of the Sudoku and RDM tasks and behavioral  
893 performance in the tasks.

894 (A) The Sudoku and RDM task sequences. (B) The relationship between task difficulty and the  
895 mean accuracy in the initial decision (2-s task immediately after training). (C) The relationship  
896 between the uncertainty level of the initial decision (4 – confidence rating) and the likelihood of  
897 errors in the initial and final decisions. (D) The individual uncertainty sensitivity ( $A_{ROC}$ , circles)  
898 and decision accuracy (diamonds) in the initial decision. (E) The individual  $r_{RT-uncertainty}$  in the  
899 initial and final decisions. (F) The relationship between the uncertainty level of the initial  
900 decision and the extent of uncertainty reduction by redecision (solid lines) and the uncertainty  
901 level after redecision (broken lines). (G) The relationship between the extent of uncertainty  
902 reduction and the accuracy change by redecision. (H) The individual uncertainty sensitivity  
903 ( $A_{ROC}$ , circles) and decision accuracy (diamonds) in the final decision. (I) The individual  
904 uncertainty sensitivity ( $A_{ROC}$ ) in the initial and final decisions. The data illustrated from C-I were  
905 from the main fMRI experiment (fMRI1). Red, the Sudoku task; Blue, the RDM task. Error bars  
906 indicate S.E.M. across the participants.



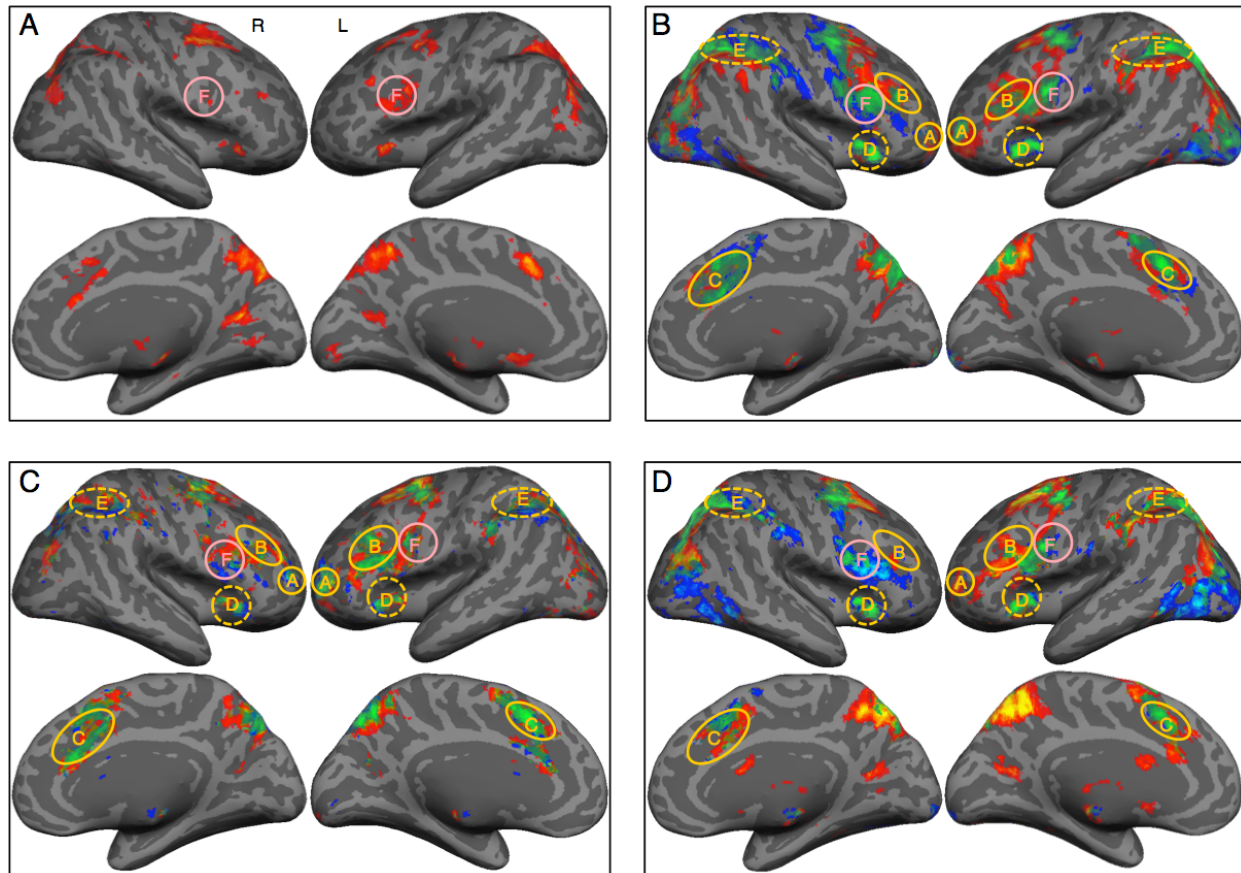

907

908

909 **Figure 2.** The metacognition network involving in metacognitive monitoring and metacognitive  
910 controlling.

911 (A) Activations of the task trials in comparison with those of the control trials during the initial  
912 decision. (B) Activations of the task trials in comparison with those of the control trials during  
913 the redecision phase. (C) Activations of the task trials during the redecision phase regressed with  
914 the uncertainty levels. (D) Activations of the task trials with redecision required in comparison  
915 with those with redecision not required in fMRI3. Red-yellow patches indicate activations in the  
916 Sudoku task, blue-lightness patches indicate activations in the RDM task,  $P < 0.05$ , false  
917 discovery rate (FDR) corrected. Green-lightness patches indicate conjunction activations across  
918 the two tasks,  $P < 0.005$ , cluster-size corrected. *A*, IFPC; *B*, mDLPFC; *C*, dACC; *D*, AIC; *E*,  
919 aIPL; *F*, IFJ.

920

921

922

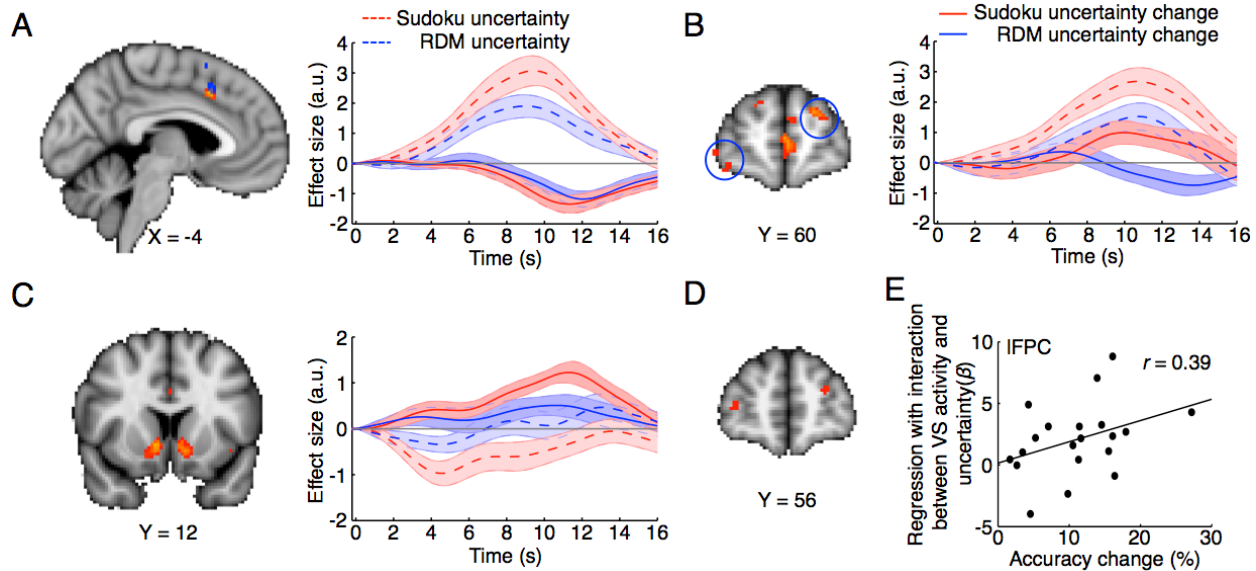

923

924

925 **Figure 3.** Dissociation of metacognitive monitoring in dACC and metacognitive controlling in  
926 IFPC in redecision.

927 (A) The dACC activity was negatively correlated with the level of uncertainty reduction after  
928 orthogonalization with the uncertainty level in the Sudoku and RDM tasks. (B) The IFPC activity  
929 was positively correlated with the level of uncertainty reduction in the Sudoku task, but the  
930 correlation was negative in the RDM task. (C) The ventral striatum (VS) activity was positively  
931 correlated with the uncertainty reduction in the Sudoku task, though the early VS activity was  
932 negatively correlated with the uncertainty level. (D) The IFPC activity was significantly  
933 modulated by the VS activity (physiological effect) and the uncertainty level (psychological  
934 effect) interaction (PPI) in the Sudoku task. (E) The individual accuracy change by redecision  
935 was positively correlated with the PPI coupling strength in the IFPC region in the Sudoku task.  
936 The time courses are relative to the onset of the initial decision.

937

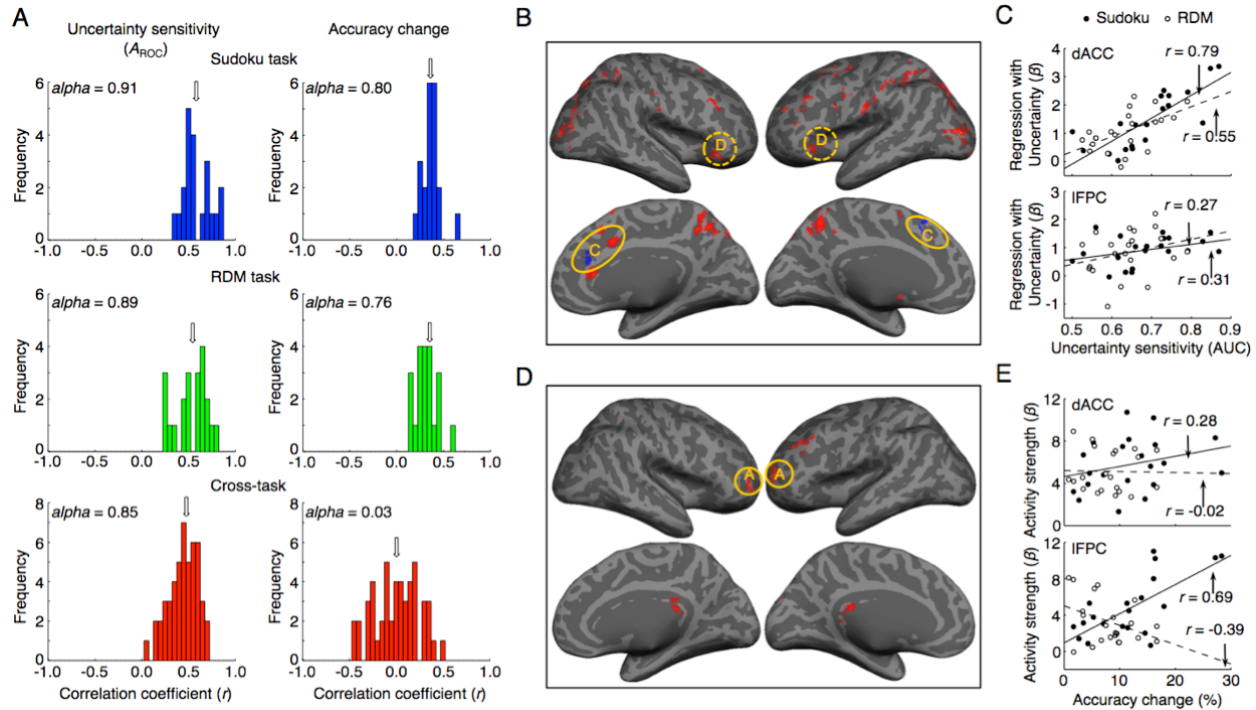

938

939

940 **Figure 4.** Individual metacognitive abilities of uncertainty sensitivity and accuracy change were  
 941 separately associated with the dACC and IFPC activities in redecision.

942 (A) The histograms of correlation coefficients of individual uncertainty sensitivity ( $A_{ROC}$ , left  
 943 column) and individual accuracy change (right column) between different sessions in the Sudoku  
 944 or RDM task, and across the two tasks. The arrows indicate the medians of the histograms. (B)  
 945 The individual uncertainty sensitivity ( $A_{ROC}$ ) was positively correlated with the uncertainty-level  
 946 regression  $\beta$  values of the fMRI activities mainly in the dACC and AIC. (C) The scatter plots of  
 947 the dACC and IFPC activities regressed with the uncertainty level against the individual  
 948 uncertainty sensitivity. (D) The individual accuracy change was positively correlated with the  
 949 mean activity predominately in the IFPC region. (E) The scatter plots of the dACC and IFPC  
 950 mean activity against the individual accuracy change. In C and E, the solid lines indicate fitting  
 951 data in the Sudoku task and the broken lines indicate fitting data in the RDM task. The  
 952 conventions in B and C are the same as in Fig. 2.

953

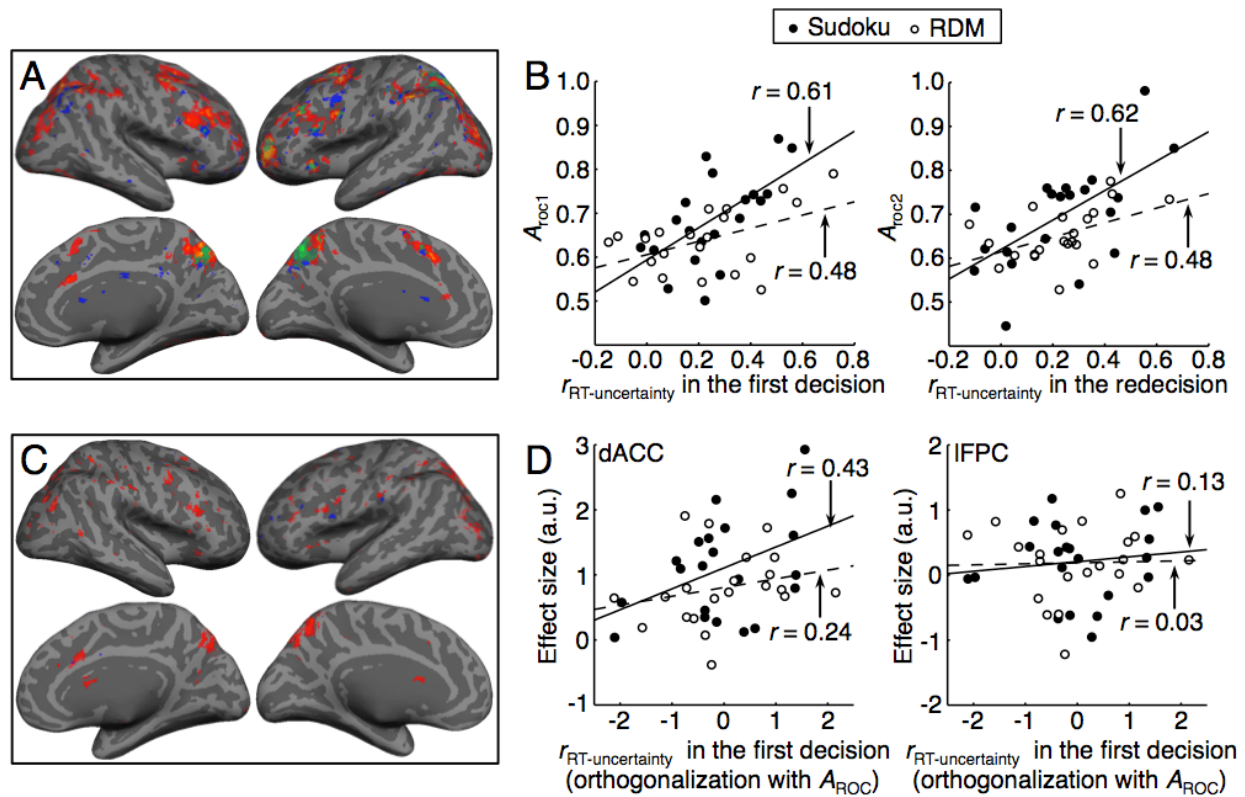

954

955

956 **Figure 5.** The response time (RT) also reflected decision uncertainty sensitivity.

957 (A) The RT was positively correlated with the activities of the regions in the metacognition  
 958 network in redecision, in the Sudoku and RDM tasks. (B) The individual  $r_{RT-uncertainty}$  was  
 959 positively correlated with the individual uncertainty sensitivity ( $A_{ROC}$ ) in the initial and final  
 960 decisions in both tasks. (C) The individual  $r_{RT-uncertainty}$ , even after orthogonalization with the  
 961 uncertainty sensitivity, was also positively correlated with the uncertainty-level regression  $\beta$   
 962 values of the dACC activities mainly in the Sudoku task. (D) The scatter plots of the individual  
 963  $r_{RT-uncertainty}$  after orthogonalization with the uncertainty sensitivity, against with the uncertainty-  
 964 level regression  $\beta$  values of the fMRI activities in the dACC and IFPC regions in both tasks.

965

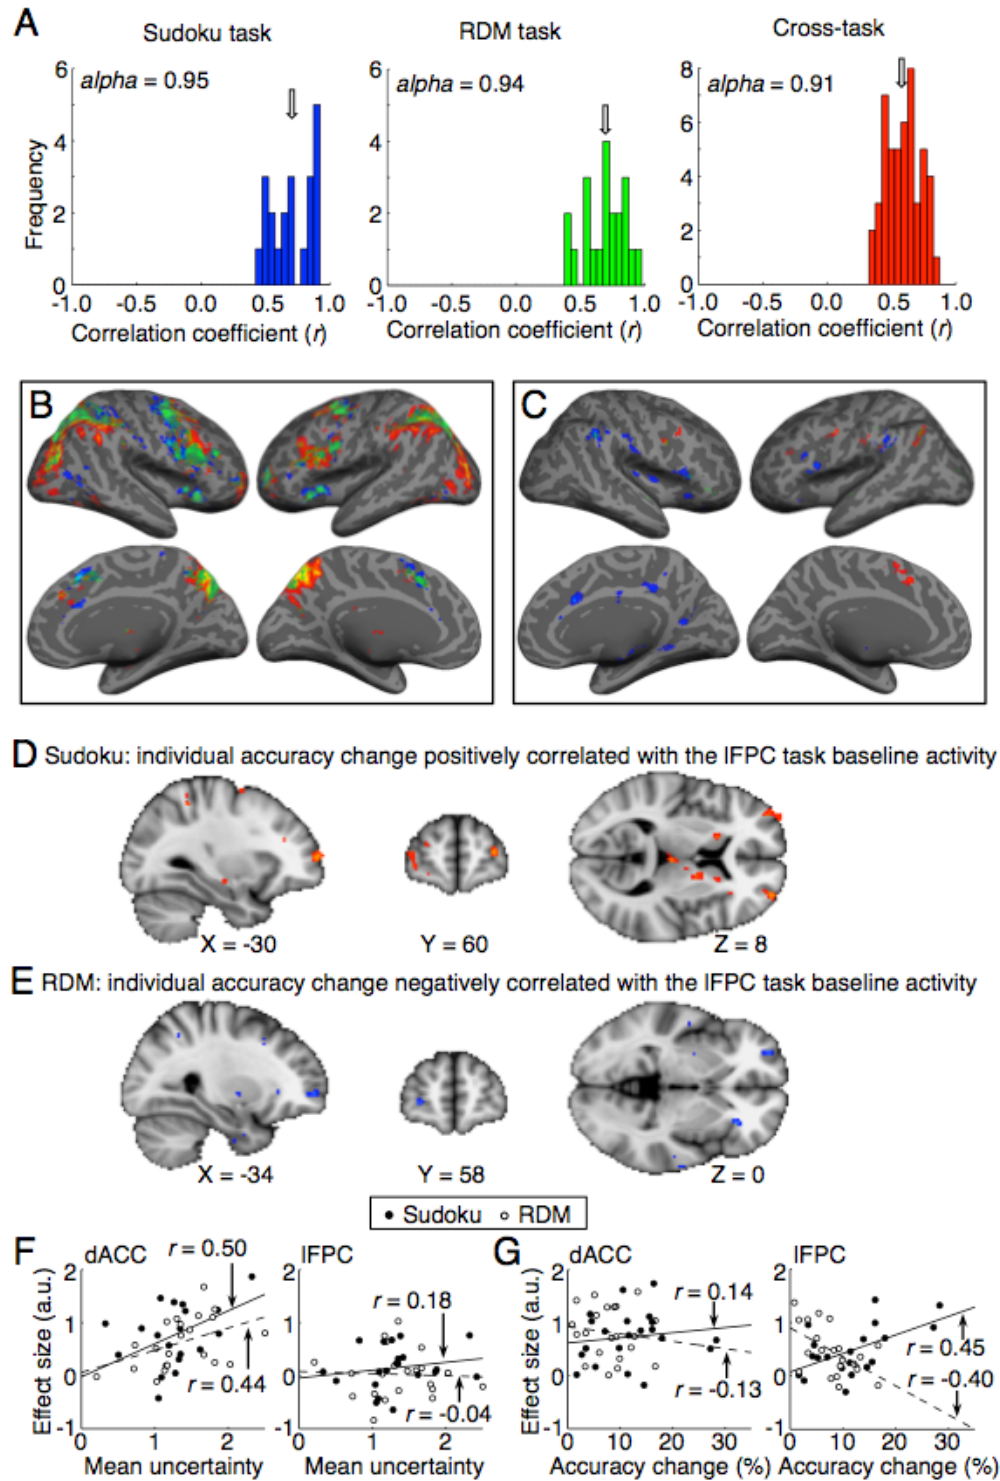

966

967

968 **Figure 6.** Individual metacognitive abilities predicted by the task baseline activities of the dACC  
 969 and IFPC regions in the metacognition network in redecision.

970 (A) The histograms of the correlation coefficients of individual mean uncertainty levels that  
971 represented individual bias of uncertainty sensitivity between different sessions of the Sudoku or  
972 RDM task, and across the two tasks. The arrows indicate the medians of the histograms. (B) The  
973 task baseline activities (confidence level = 4) in comparison to those of the control trials in the  
974 Sudoku and RDM tasks. (C) Positive correlation of task baseline activities during the redecision  
975 phase of the task trials with the individual mean uncertainty level across the participants. The  
976 conventions in B and C are the same as in Fig. 2. (D) The IFPC task baseline activities (in  
977 comparison to those of the control trials) were positively correlated with the individual accuracy  
978 change across the participants in the Sudoku task. (E) The IFPC task baseline activities were  
979 negatively correlated with the individual accuracy change across the participants in the RDM  
980 task. (F) The scatter plots of the dACC and IFPC task baseline activities against the individual  
981 mean uncertainty level. (G) The scatter plots of the dACC and IFPC task baseline activities  
982 against the individual accuracy change. In F and G, the solid lines indicate fitting data in the  
983 Sudoku task and the broken lines indicate fitting data in the RDM task.  
984

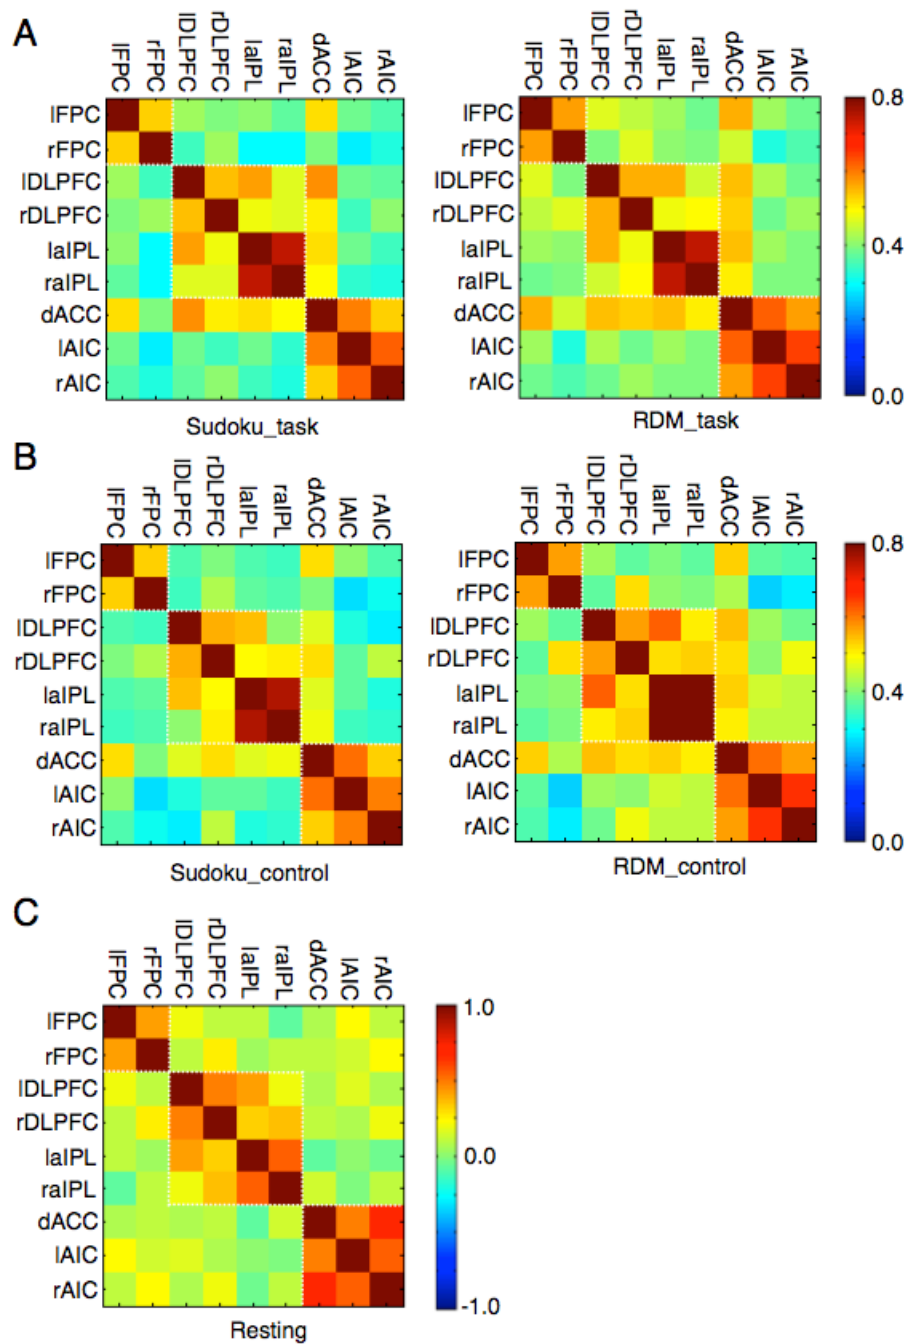

985

986

987 **Figure 7.** The regional functional connectivity of the metacognition network during the task (A)

988 and control (B) conditions in the Sudoku and RDM tasks, as well as during the resting state (C).

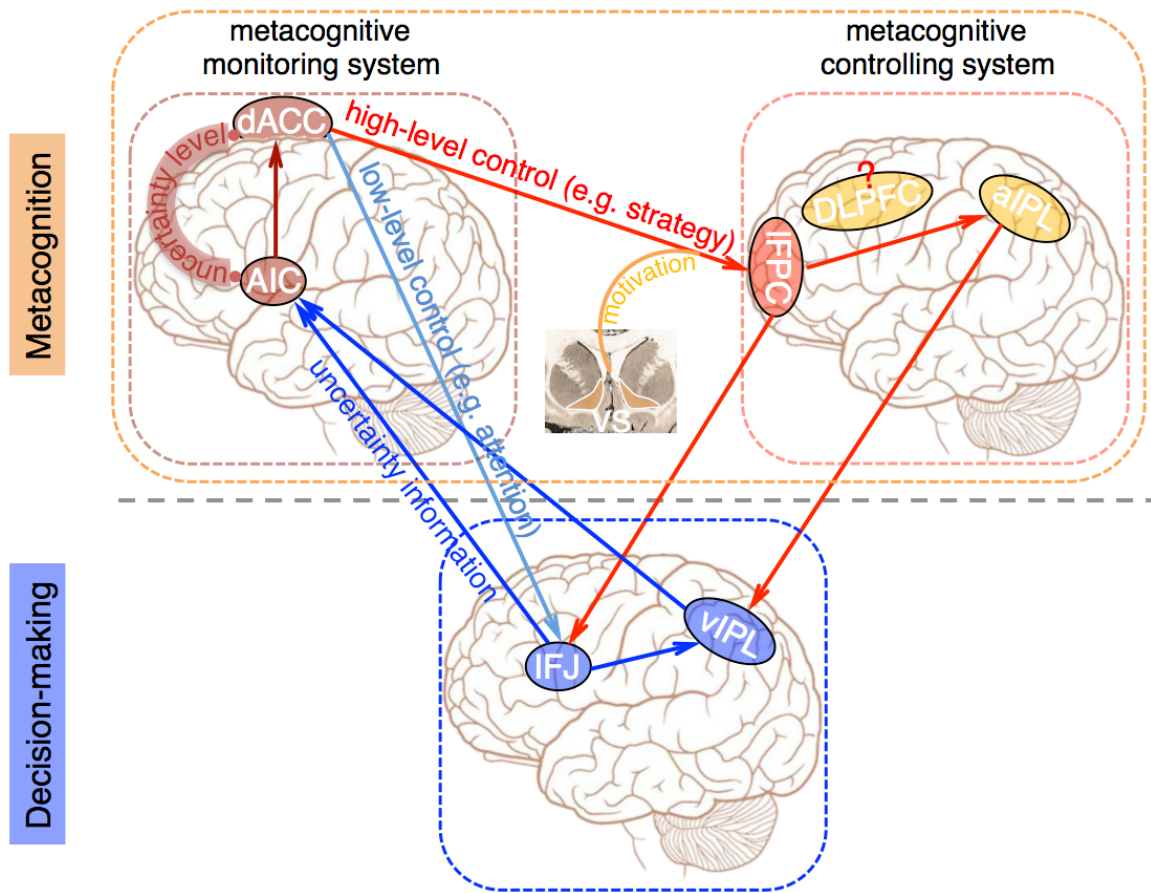

989

990

991 **Figure 8.** The functional architecture of the metacognition neural system

992 The scheme of functional architecture of the metacognition neural system and its interactions  
993 with the decision-making neural system, synthesized from the converging results in the current  
994 study. The metacognition neural system is comprised of the metacognitive monitoring system  
995 (dACC and AIC) and the metacognitive controlling system (IFPC). The decision-making neural  
996 system and the metacognition system construct a closed-loop system to control and adapt our  
997 behaviors toward the task goals.

998



999

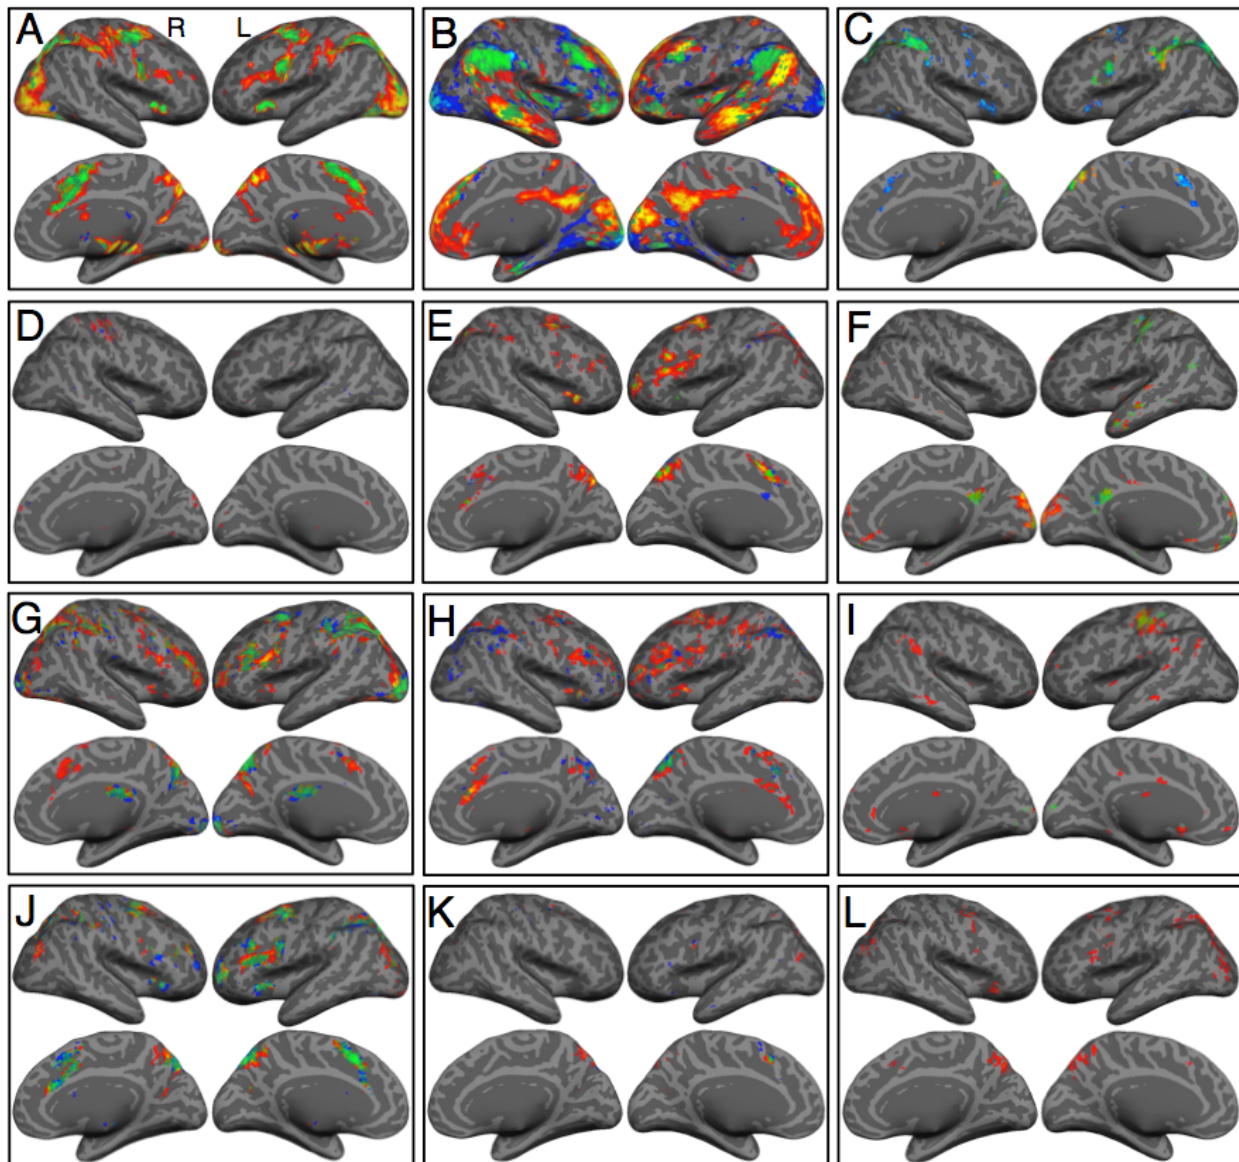

1000

1001 **Figure Supplementary 1 (related to Figure 2)**

1002 Collective statistical parametric maps in the experiments. (A) Activations during the decision phase  
1003 compared with those during the ITI period in fMRI1. (B) Activations during the redecision phase  
1004 compared with those during the decision phase in fMRI1. (C) Activations of the initial decision during the  
1005 redecision phase compared with those of the control condition during the same phase in fMRI2. (D)  
1006 Positive correlation of activities during the decision phase with the uncertainty level in fMRI1 (there were  
1007 also no negative correlation). (E) Positive correlation of activities during the redecision phase of the  
1008 correct trials with the uncertainty level in fMRI1. (F) Negative correlation of activities during the  
1009 redecision phase with the uncertainty level in fMRI1. (G) Activations during the redecision phase without  
1010 requirement to decide the previous situation again compared with those of the control trials during the  
1011 same phase in fMRI3. (H) Positive correlation of activities during the redecision phase with the level of  
1012 uncertainty reduction in fMRI1. (I) Positive correlation of activities during the redecision phase with the  
1013 level of uncertainty reduction after orthogonalization with the uncertainty level in fMRI1. (J) Positive  
1014 correlation of activities during the redecision phase with the uncertainty level after orthogonalization with

1015 the level of uncertainty reduction in fMRI1. (K) Negative correlation of activities during the redecision  
1016 phase with the level of uncertainty reduction after orthogonalization with the uncertainty level in fMRI1.  
1017 (L) Positive correlation of activities during the redecision phase with the interaction between the  
1018 uncertainty level and the level of uncertainty reduction in fMRI1. The conventions are the same as in Fig.  
1019 2.  
1020  
1021

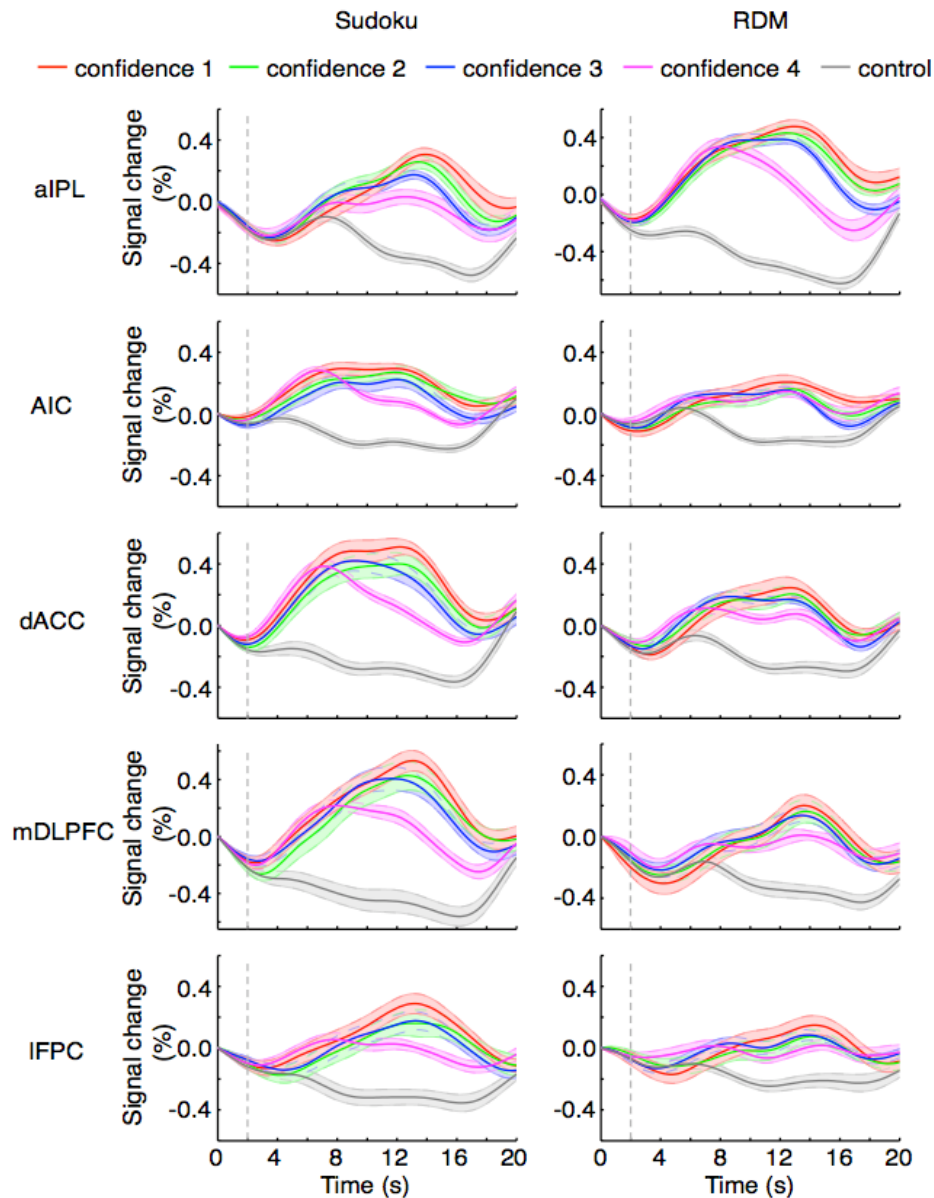

1022

1023

### 1024 **Figure Supplementary 2 (related to Figure 2)**

1025 The time courses of fMRI signal changes of the regions in the metacognition network at different  
1026 confidence levels in fMRI1. The time zero was the onset of the initial decision and the dash line indicates  
1027 the mean offset of the initial decision.  
1028

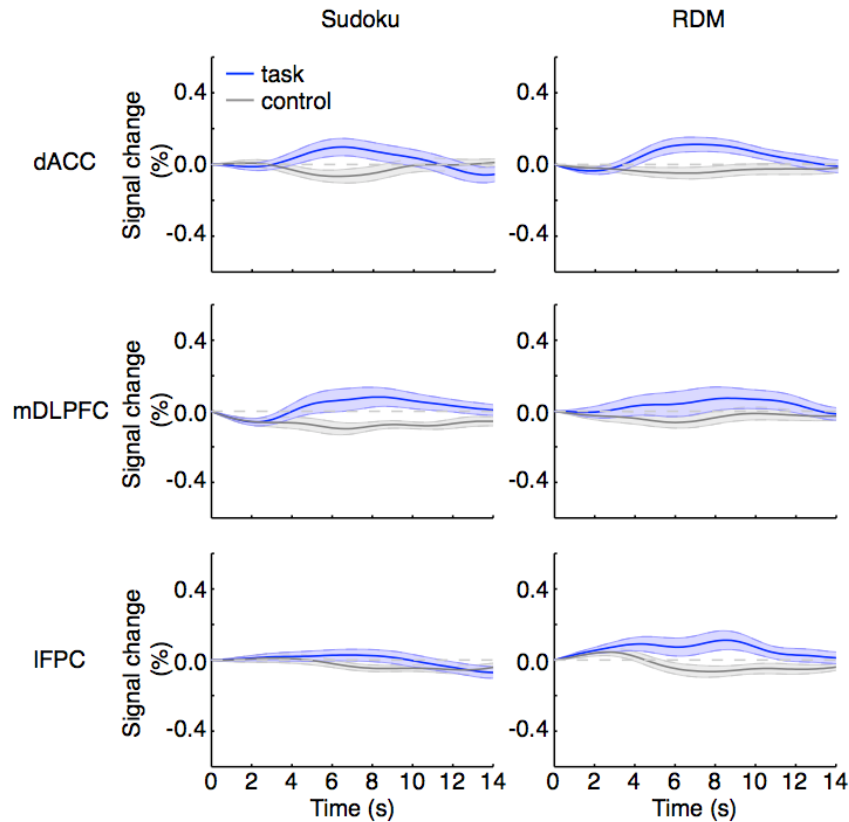

1029

### 1030 **Figure Supplementary 3 (related to Figure 2)**

1031 The time courses of the fMRI signal changes of the dACC, mDLPFC and IFPC regions during the initial  
1032 decision in the second phase in fMRI2. The time zero was the onset of the stimuli presentation in the  
1033 second phase. The participant made the initial decision in the second phase and the decision duration  
1034 lasted for 4 s, longer than the initial decision period (2 s) in fMRI1. It should be noted that there were no  
1035 significant activities in the mDLPFC and IFPC, whereas the dACC activities were delayed for over 3 s  
1036 from the onset.  
1037  
1038

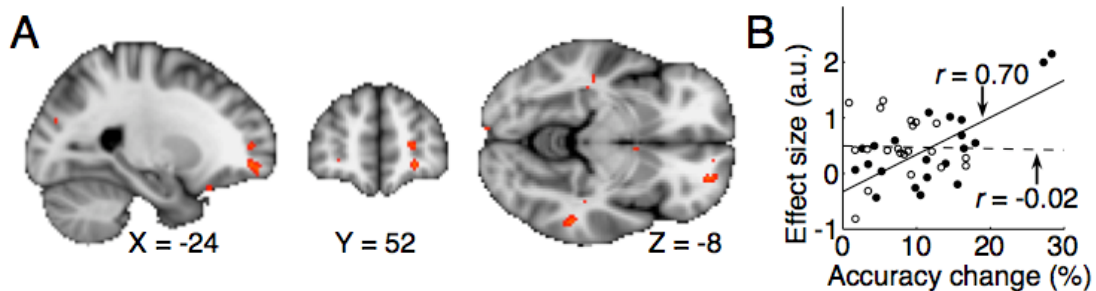

1039

### 1040 **Figure Supplementary 4 (related to Figure 4)**

1041 The individual accuracy change by redecision was positively correlated with the uncertainty-level  
1042 regression  $\beta$  value of the IFPC activity in the Sudoku task (A; one tailed  $t$ -test,  $r = 0.70$ ,  $t_{19} = 4.3$ ,  $P =$   
1043  $0.00017$ ), but not in the RDM task (B; one tailed  $t$ -test,  $r = 0.70$ ,  $t_{19} = 4.3$ ,  $P = 0.00017$ ).  
1044

1045 Table S1. Activations between the task and control conditions. *Related to Figure 2*

| Task                                              | Anatomical Region                        | Hemispheres | Coordinate (x, y, z) | Maximum Z value |
|---------------------------------------------------|------------------------------------------|-------------|----------------------|-----------------|
| <b>Task – control during the decision phase</b>   |                                          |             |                      |                 |
| Sudoku                                            | inferior frontal junction (IFJ)          | L           | -46, 8, 24           | 5.0             |
|                                                   |                                          | R           | 54, 14, 26           | 4.8             |
| <b>Task – ITI</b>                                 |                                          |             |                      |                 |
| Conjunction (Sudoku/RDM)                          | inferior frontal junction (IFJ)          | L           | -46, 4, 30           | 4.2             |
|                                                   |                                          | R           | 52, 6, 28            | 4.4             |
| <b>Task – control during the redecision phase</b> |                                          |             |                      |                 |
| Conjunction (Sudoku/RDM)                          | lateral frontopolar cortex (IFPC)        | L           | -30, 52, 6           | 4.7             |
|                                                   |                                          | R           | 34, 56, 2            | 3.0             |
|                                                   | dorsolateral prefrontal cortex (DLPFC)   | L           | -46, 30, 22          | 3.8             |
|                                                   |                                          | R           | 46, 36, 22           | 4.8             |
|                                                   | dorsal anterior cingulate cortex (dACC)  | –           | -2, 10, 44           | 5.8             |
|                                                   | anterior insular cortex (AIC)            | L           | -30, 26, -8          | 6.1             |
|                                                   |                                          | R           | 32, 26, -10          | 6.5             |
|                                                   | anterior inferior parietal lobule (aIPL) | L           | -32, -56, 44         | 5.6             |
|                                                   |                                          | R           | 34, -54, 48          | 5.6             |
|                                                   | inferior frontal junction (IFJ)          | L           | -48, 8, 24           | 5.4             |
|                                                   |                                          | R           | 52, 12, 28           | 5.2             |
|                                                   | <b>Redecision – No-redecision</b>        |             |                      |                 |
| Conjunction (Sudoku/RDM)                          | lateral frontopolar cortex (IFPC)        | L           | -30, 50, 10          | 3.2             |
|                                                   |                                          | R           | 34, 56, 2            | 3.0             |
|                                                   | dorsolateral prefrontal cortex (DLPFC)   | L           | -44, 28, 22          | 3.1             |
|                                                   |                                          | R           | 48, 38, 20           | 4.3             |
|                                                   | dorsal anterior cingulate cortex (dACC)  | –           | -4, 24, 36           | 4.7             |
|                                                   | anterior insular cortex (AIC)            | L           | -32, 24, -6          | 5.6             |
|                                                   |                                          | R           | 32, 22, -6           | 5.3             |
|                                                   | anterior inferior parietal lobule (aIPL) | L           | -34, -46, 44         | 4.0             |
| R                                                 |                                          | 38, -48, 42 | 4.0                  |                 |
| inferior frontal junction (IFJ)                   | L                                        | -44, 4, 26  | 4.6                  |                 |
|                                                   | R                                        | 52, 14, 26  | 5.1                  |                 |

1046  
1047

1048 Table S2. Activations correlated with the uncertainty level and the uncertainty reduction during the  
1049 redecision phase. *Related to Figure 2-3*

| Task                                        | Anatomical Region                           | Hemispheres  | Coordinate (x, y, z) | Maximum |
|---------------------------------------------|---------------------------------------------|--------------|----------------------|---------|
| <b>Uncertainty (positive)</b>               |                                             |              |                      |         |
| Conjunction<br>(Sudoku/RDM)                 | lateral frontopolar cortex<br>(IFPC)        | L            | -30, 56, 4           | 4.2     |
|                                             |                                             | R            | 30, 52, 10           | 3.5     |
|                                             | dorsolateral prefrontal<br>cortex (DLPFC)   | L            | -44, 28, 24          | 4.4     |
|                                             |                                             | R            | 42, 30, 22           | 3.7     |
|                                             | dorsal anterior cingulate<br>cortex (dACC)  | –            | -4, 14, 46           | 4.8     |
|                                             | anterior insular cortex (AIC)               | L            | -30, 26, -4          | 4.3     |
|                                             |                                             | R            | 32, 24, -2           | 4.5     |
|                                             | anterior inferior parietal<br>lobule (aIPL) | L            | -48, 12, 26          | 4.0     |
| R                                           |                                             | 48, 14, 24   | 3.7                  |         |
| anterior inferior parietal<br>lobule (aIPL) | L                                           | -32, -56, 40 | 3.9                  |         |
|                                             | R                                           | 44, -42, 54  | 3.8                  |         |
| <b>Uncertainty (negative)</b>               |                                             |              |                      |         |
| Conjunction<br>(Sudoku/RDM)                 | ventromedial prefrontal<br>cortex (VMFPC)   | –            | 0, 48, -14           | 3.8     |
|                                             | posterior cingulate cortex<br>(PCC)         | –            | 0, -48, 22           | 4.0     |
| <b>Uncertainty reduction (positive)</b>     |                                             |              |                      |         |
| Sudoku                                      | ventral striatum<br>(VS)                    | L            | -10, 12, -8          | 4.2     |
|                                             |                                             | R            | 10, 12, -4           | 4.5     |
|                                             | ventromedial prefrontal<br>cortex (VMFPC)   | –            | -2, 56, -4           | 4.2     |

1050  
1051

1052 Table S3. Activations positively correlated with the individual uncertainty sensitivity and the individual  
 1053 accuracy change. *Related to Figure 4-6*

| Task                                                      | Anatomical Region                       | Hemispheres | Coordinate (x, y, z) | Maximum |
|-----------------------------------------------------------|-----------------------------------------|-------------|----------------------|---------|
| <b>Uncertainty sensitivity (<math>A_{roc}</math>)</b>     |                                         |             |                      |         |
| Sudoku                                                    | dorsal anterior cingulate cortex (dACC) | R           | 8, 16,38             | 3.5     |
|                                                           | anterior insular cortex (AIC)           | L           | -38, 22, -4          | 3.8     |
|                                                           |                                         | R           | 42, 24, -12          | 4.1     |
| RDM                                                       | dorsal anterior cingulate cortex (dACC) | L           | -4, 18, 48           | 3.4     |
| <b>RT-uncertainty correlation coefficient<sup>1</sup></b> |                                         |             |                      |         |
| Sudoku                                                    | dorsal anterior cingulate cortex (dACC) | R           | 6, 18,42             | 3.1     |
| <b>Mean uncertainty</b>                                   |                                         |             |                      |         |
| Sudoku                                                    | dorsal anterior cingulate cortex (dACC) | L           | -6, 16,44            | 3.3     |
| RDM                                                       | dorsal anterior cingulate cortex (dACC) | R           | 4, 14, 46            | 3.6     |
|                                                           | anterior insular cortex (AIC)           | R           | 40, 22, -14          | 3.5     |
| <b>Accuracy change</b>                                    |                                         |             |                      |         |
| Sudoku                                                    | lateral frontopolar cortex (IFPC)       | L           | -26, 54, 10          | 4.0     |
|                                                           |                                         | R           | 26, 48, 6            | 3.7     |

1054 <sup>1</sup>after orthogonalization with the uncertainty sensitivity.  
 1055

1056

1057

1058
